# Supplementary material for: Thermally stable polyfluorinated monoalkoxysilanetriols and dialkoxydisiloxanetetrols
Source: Royal Society of Chemistry journal article supplement (doi:10.1039/d1dt03389a), 2021-01-01
Supplement: d1dt03389a1.pdf [file d1dt03389a1.pdf]

## Supporting Information

### Content

|                                                                                                                         |    |
|-------------------------------------------------------------------------------------------------------------------------|----|
| Characterization of $[(F_5C_6)_3CO]SiCl_3$ ( <b>1a</b> ).....                                                           | 2  |
| Characterization of $\{[3,5-(CF_3)_2C_6H_3]_3CO\}SiCl_3$ ( <b>1b</b> ).....                                             | 4  |
| Characterization of $[(F_5C_6)_3CO]Si(OH)_3$ ( <b>2a</b> ).....                                                         | 7  |
| Characterization of $\{[3,5-(CF_3)_2C_6H_3]_3CO\}Si(OH)_3$ ( <b>2b</b> ).....                                           | 10 |
| Characterization of $\{[(F_5C_6)_3CO]SiCl_2\}_2O$ ( <b>3a</b> ).....                                                    | 13 |
| Characterization of $\{[(3,5-(CF_3)_2C_6H_3)_3CO]SiCl_2\}_2O$ ( <b>3b</b> ).....                                        | 15 |
| Characterization of $\{[(F_5C_6)_3CO]Si(OH)_2\}_2O$ ( <b>4a</b> ·Et <sub>2</sub> O).....                                | 19 |
| Characterization of $\{[(3,5-(CF_3)_2C_6H_3)_3CO]Si(OH)_2\}_2O$ ·Et <sub>2</sub> O ( <b>4b</b> ·Et <sub>2</sub> O)..... | 23 |
| Thermogravimetric Analysis .....                                                                                        | 27 |
| Crystallographic data .....                                                                                             | 29 |

## Characterization of $[(F_5C_6)_3CO]SiCl_3$ (**1a**).

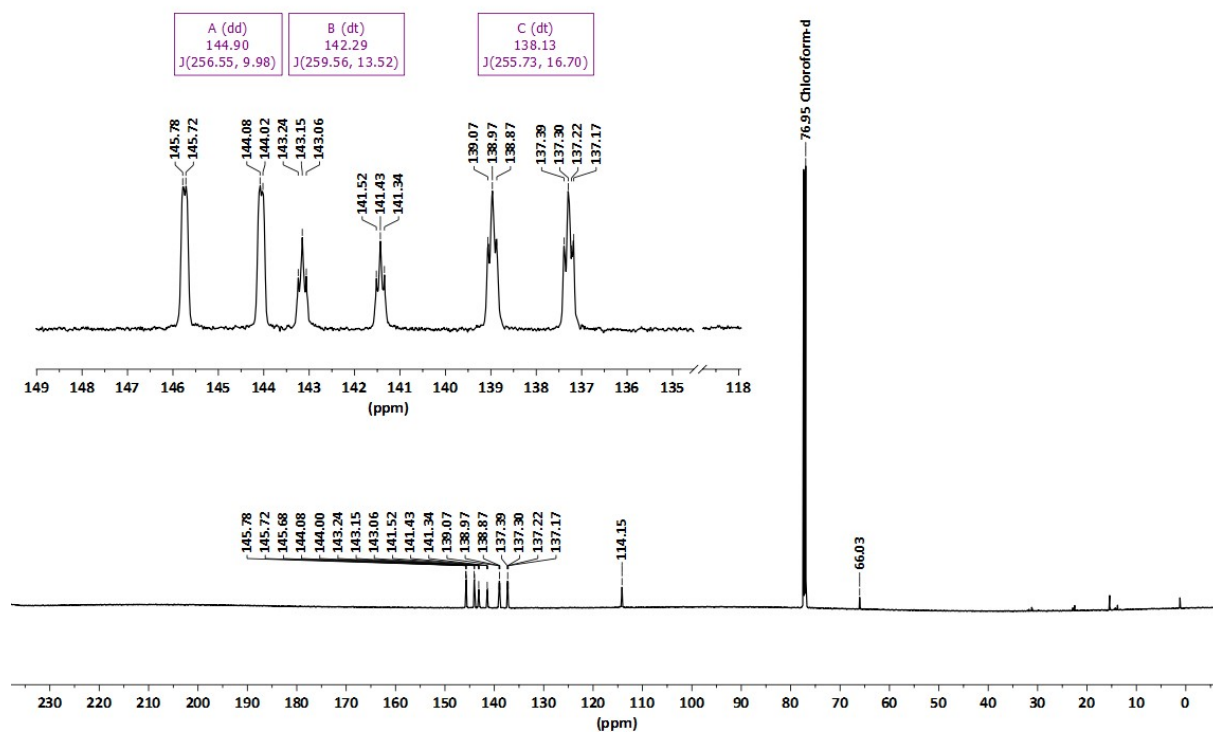

Figure S1.  $^{13}C$ -NMR spectrum (151.0 MHz,  $CDCl_3$ ) of  $[(F_5C_6)_3CO]SiCl_3$  (**1a**).

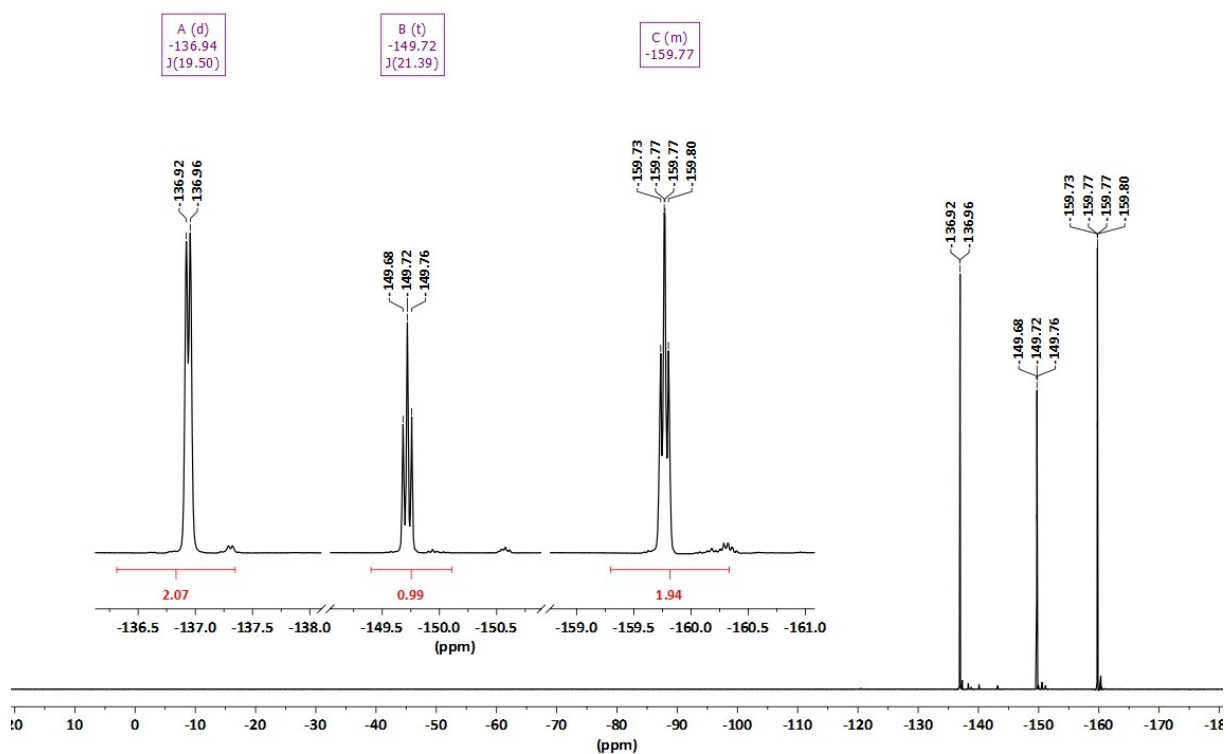

Figure S2.  $^{19}F$ -NMR spectrum (564.7 MHz,  $CDCl_3$ ) of  $[(F_5C_6)_3CO]SiCl_3$  (**1a**).

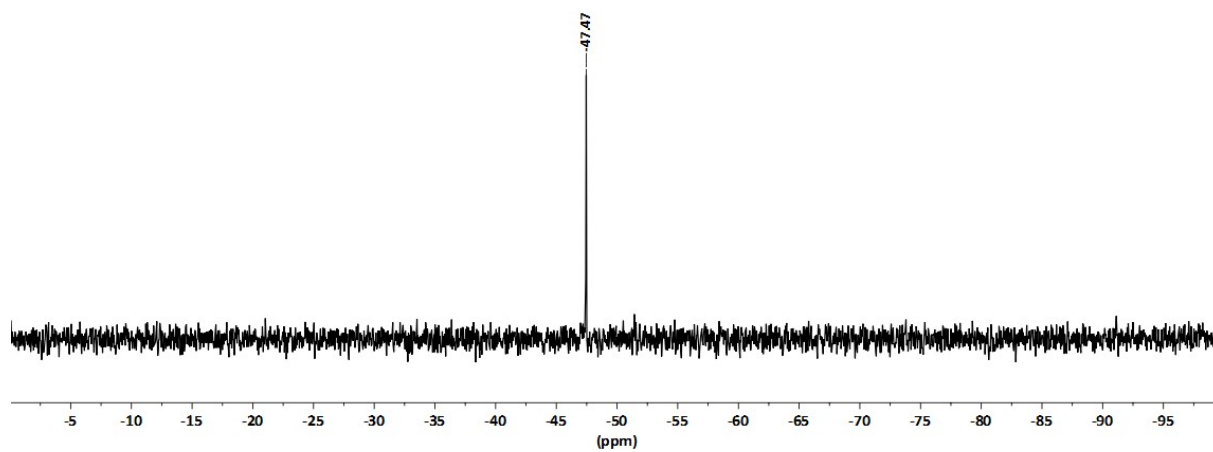

**Figure S3.**  $^{29}\text{Si}\{-^1\text{H}\}$ -NMR spectrum (119.3 MHz,  $\text{CDCl}_3$ ) of  $[(\text{F}_5\text{C}_6)_3\text{CO}]\text{SiCl}_3$  (**1a**).

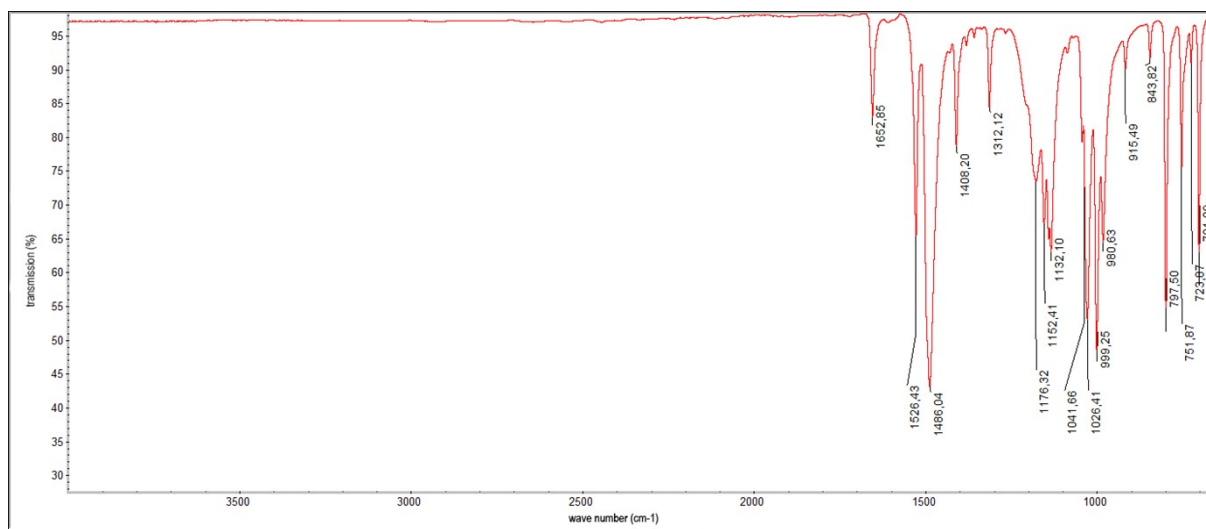

**Figure S4.** IR spectrum (neat) of  $[(\text{F}_5\text{C}_6)_3\text{CO}]\text{SiCl}_3$  (**1a**).

Characterization of  $\{[3,5-(\text{CF}_3)_2\text{C}_6\text{H}_3]_3\text{CO}\}\text{SiCl}_3$  (**1b**).

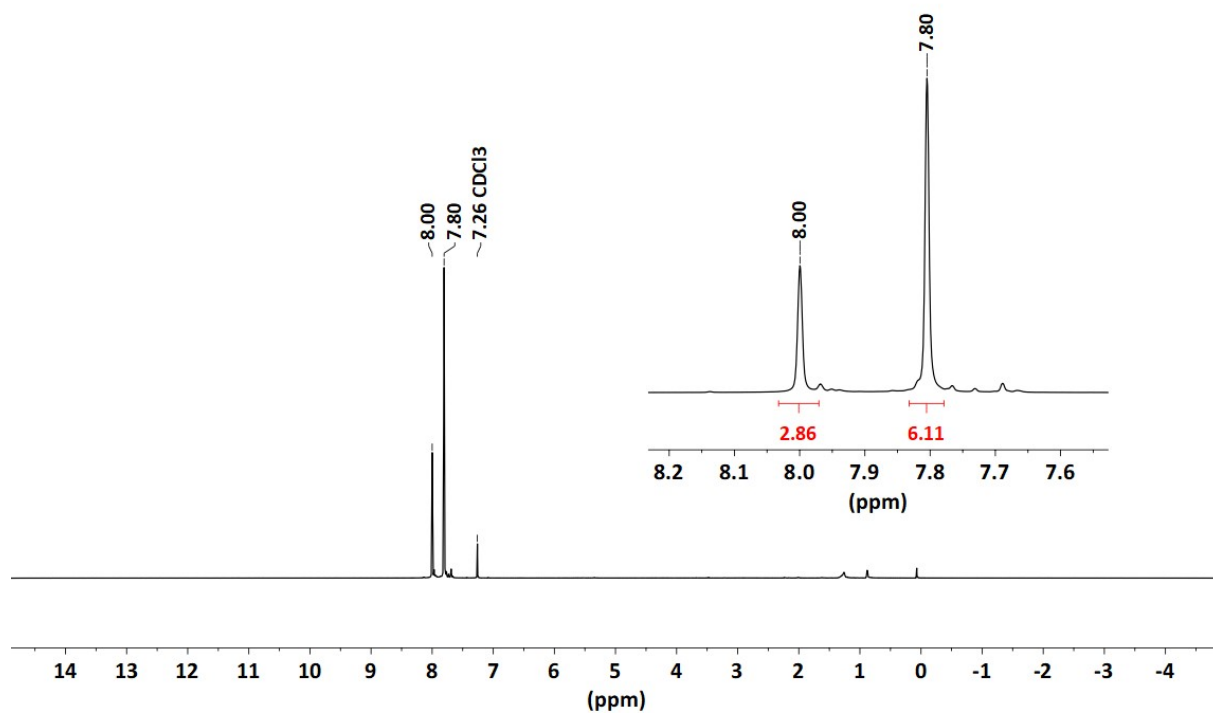

Figure S5.  $^1\text{H-NMR}$  spectrum (600.2 MHz,  $\text{CDCl}_3$ ) of  $\{[3,5-(\text{CF}_3)_2\text{C}_6\text{H}_3]_3\text{CO}\}\text{SiCl}_3$  (**1b**).

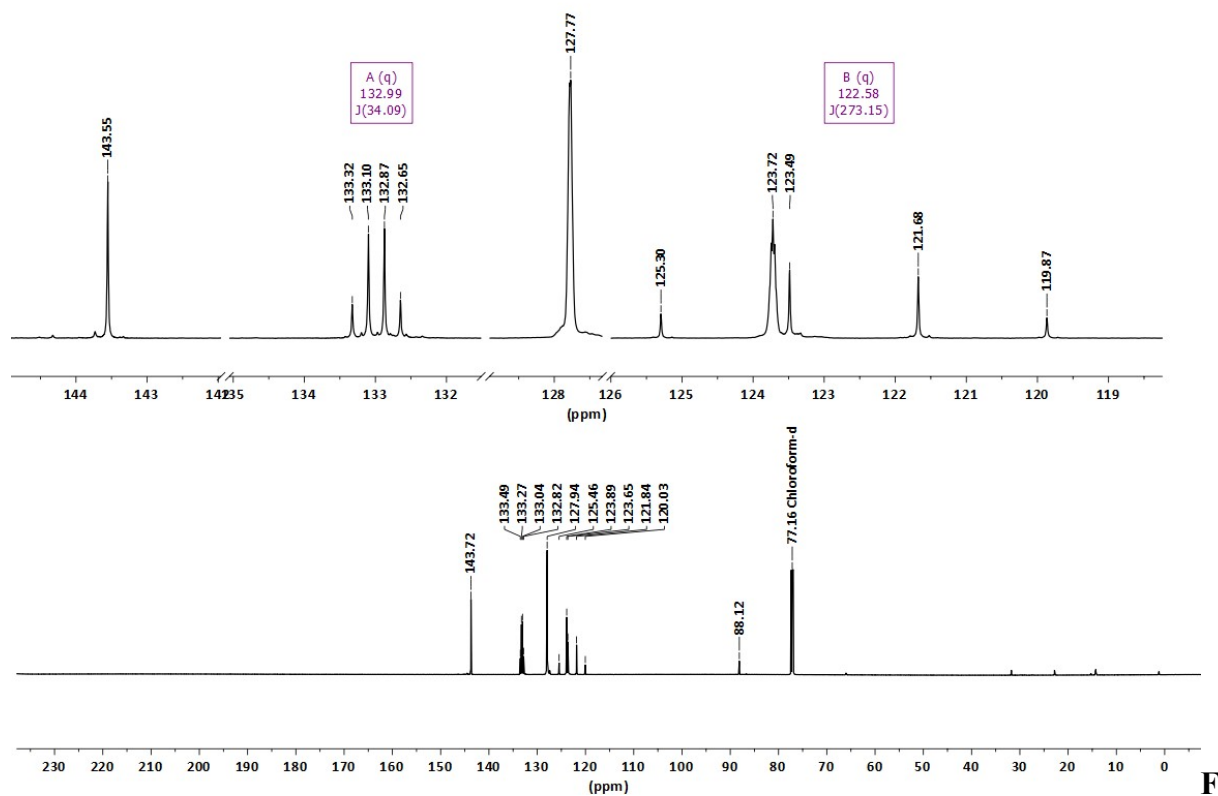

**figure S6.**  $^{13}\text{C}\{-^1\text{H}\}$ -NMR spectrum (151.0 MHz,  $\text{CDCl}_3$ ) of  $\{[3,5\text{-(CF}_3)_2\text{C}_6\text{H}_3]_3\text{CO}\}\text{SiCl}_3$  (**1b**).

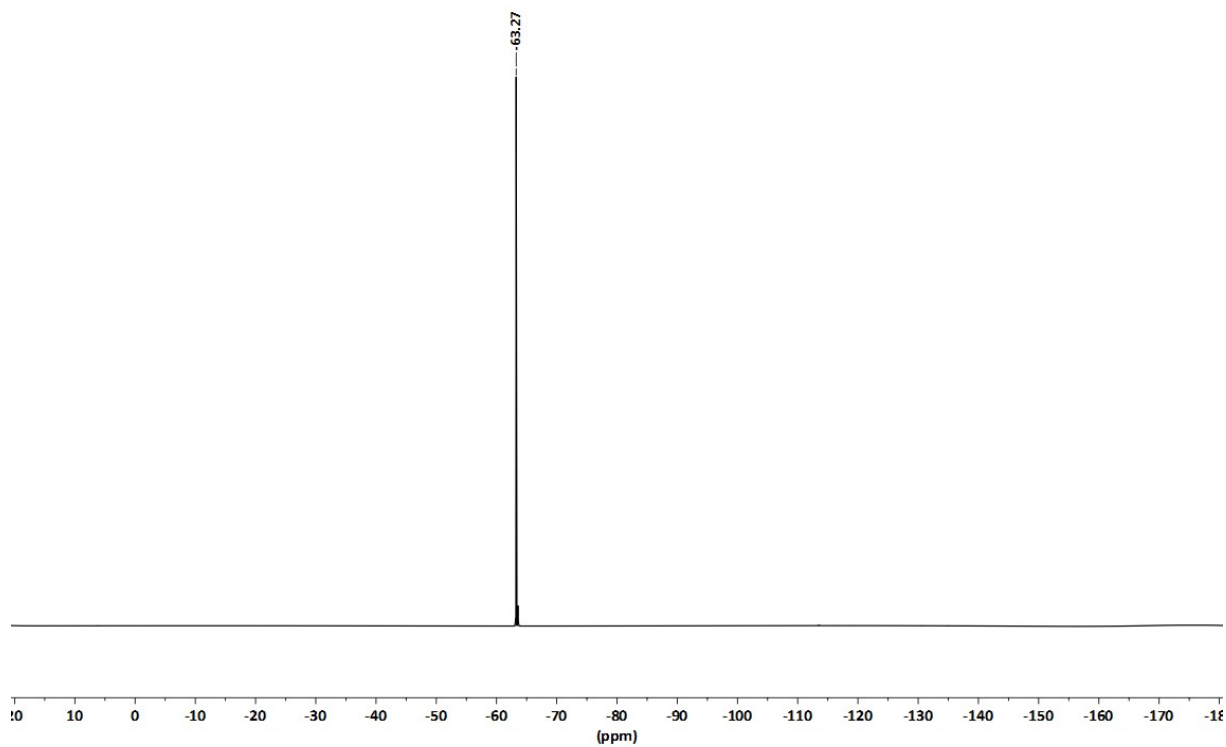

**Figure S7.**  $^{19}\text{F}$ -NMR spectrum (564.7 MHz,  $\text{CDCl}_3$ ) of  $\{[3,5\text{-(CF}_3)_2\text{C}_6\text{H}_3]_3\text{CO}\}\text{SiCl}_3$  (**1b**).

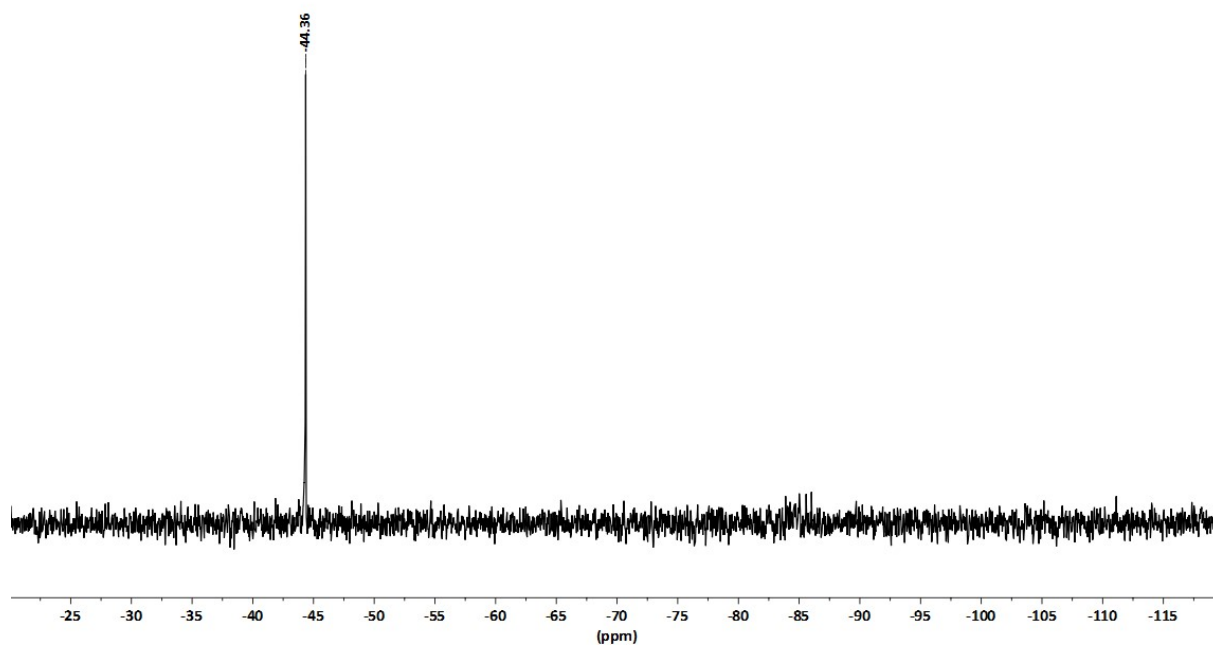

**Figure S8.**  $^{29}\text{Si}\{-^1\text{H}\}$ -NMR spectrum (119.3 MHz,  $\text{CDCl}_3$ ) of  $\{[3,5\text{-(CF}_3)_2\text{C}_6\text{H}_3]_3\text{CO}\}\text{SiCl}_3$  (**1b**).

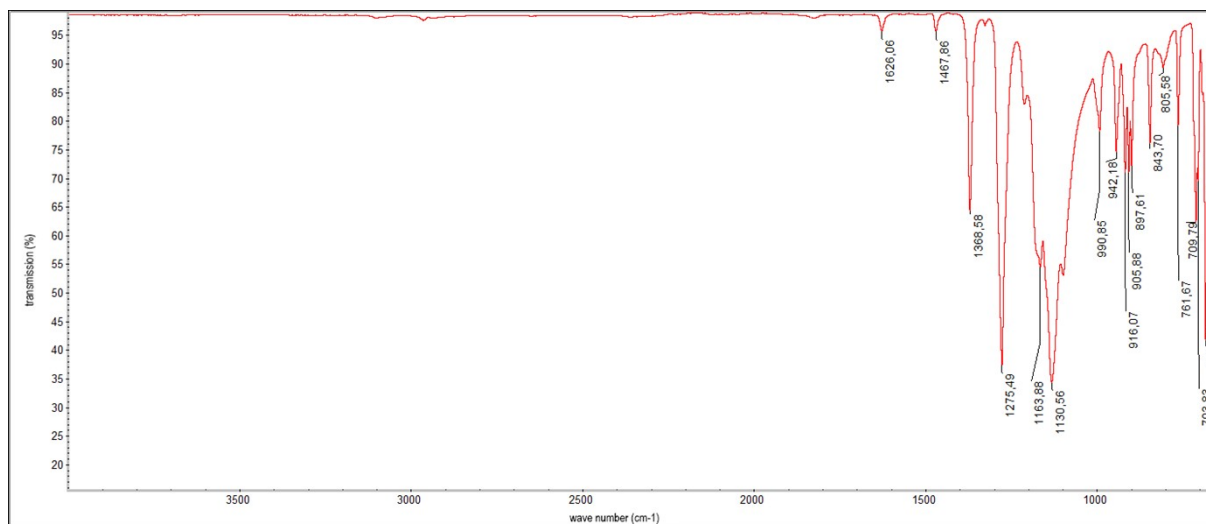

**Figure S9.** IR spectrum (neat) of  $\{[3,5\text{-(CF}_3)_2\text{C}_6\text{H}_3]_3\text{CO}\}\text{SiCl}_3$  (**1b**).

## Characterization of $[(F_5C_6)_3CO]Si(OH)_3$ (**2a**).

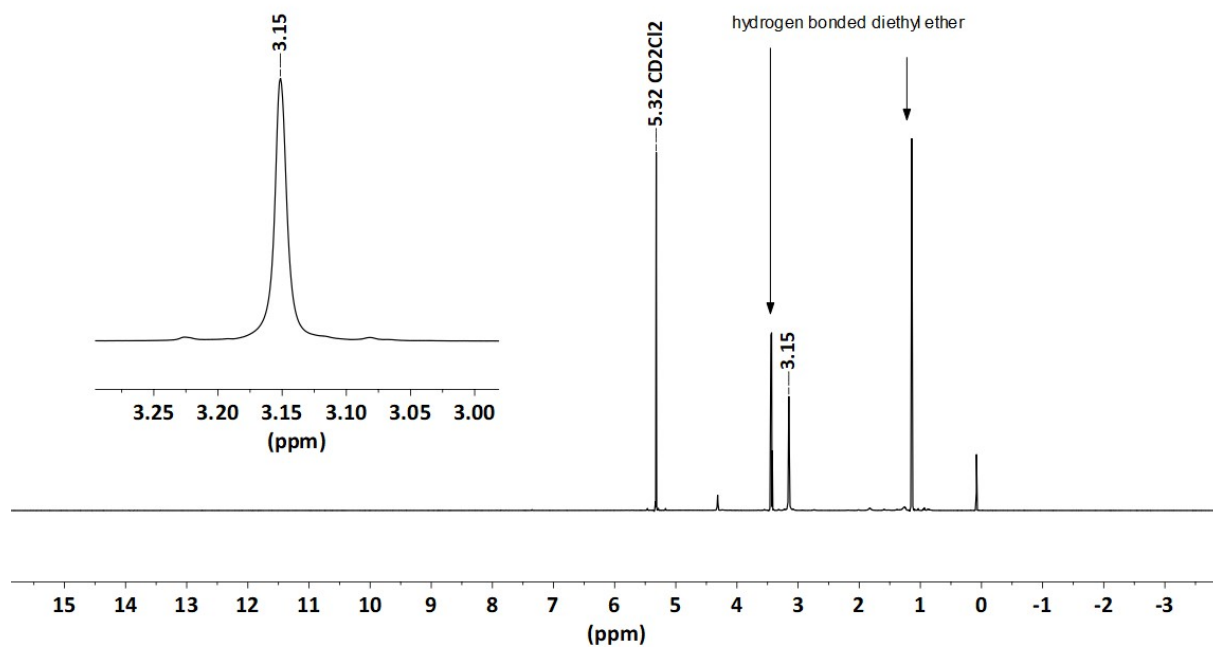

**Figure S10.**  $^1H$ -NMR spectrum (600.2 MHz,  $CD_2Cl_2$ ) of  $[(F_5C_6)_3CO]Si(OH)_3$  (**2a**).

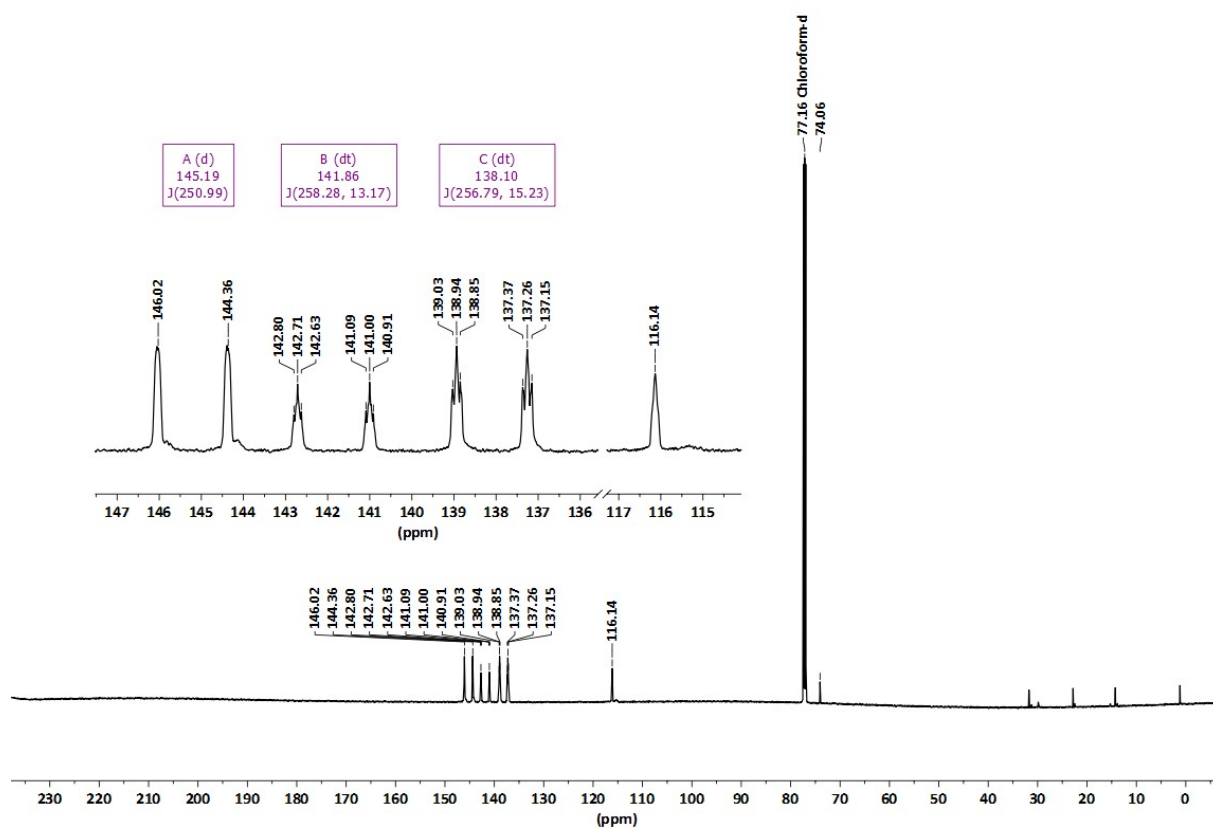

**Figure S11.**  $^{13}C$ - $\{^1H\}$ -NMR spectrum (150.9 MHz,  $CDCl_3$ ) of  $[(F_5C_6)_3CO]Si(OH)_3$  (**2a**).

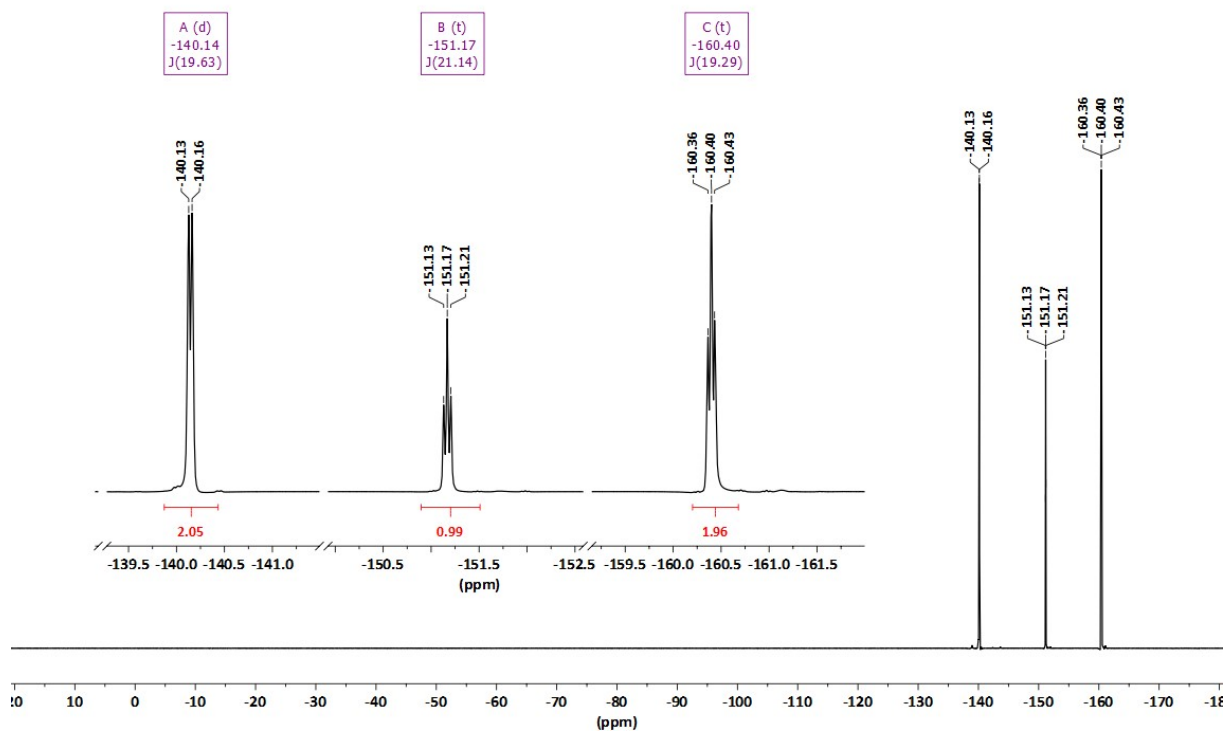

Figure S12.  $^{19}\text{F}$ -NMR spectrum (564.7 MHz,  $\text{CDCl}_3$ ) of  $[(\text{F}_5\text{C}_6)_3\text{CO}]\text{Si}(\text{OH})_3$  (**2a**).

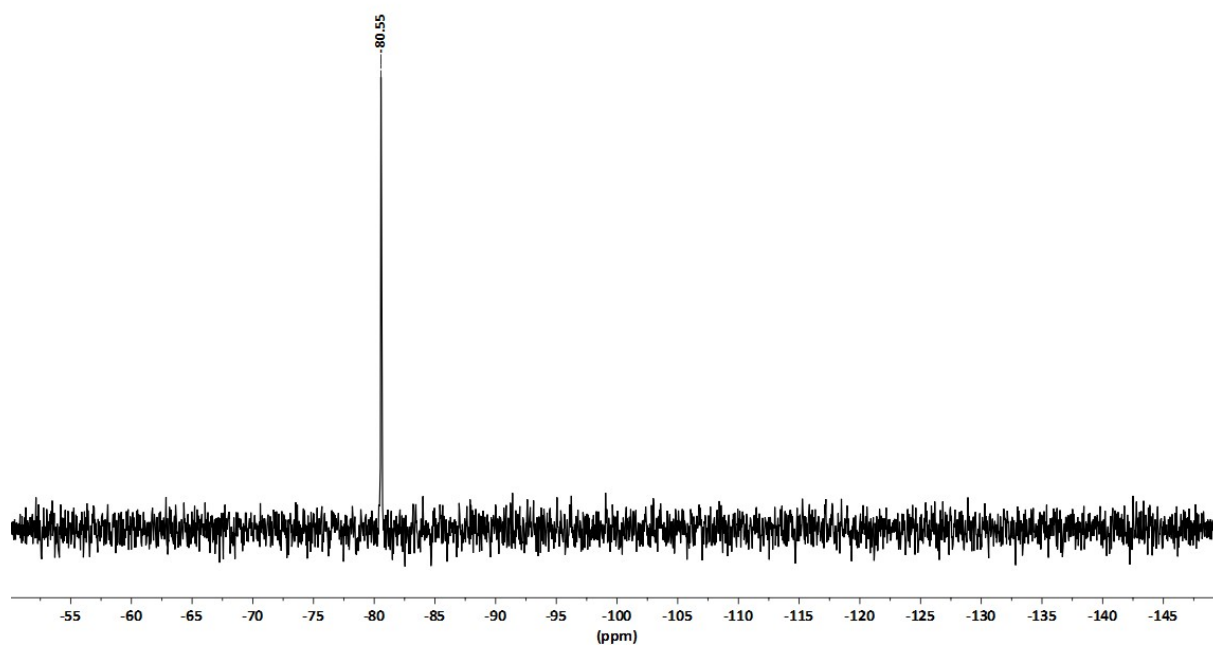

Figure S13.  $^{29}\text{Si}\{-^1\text{H}\}$ -NMR spectrum (119.3 MHz,  $\text{CDCl}_3$ ) of  $[(\text{F}_5\text{C}_6)_3\text{CO}]\text{Si}(\text{OH})_3$  (**2a**).



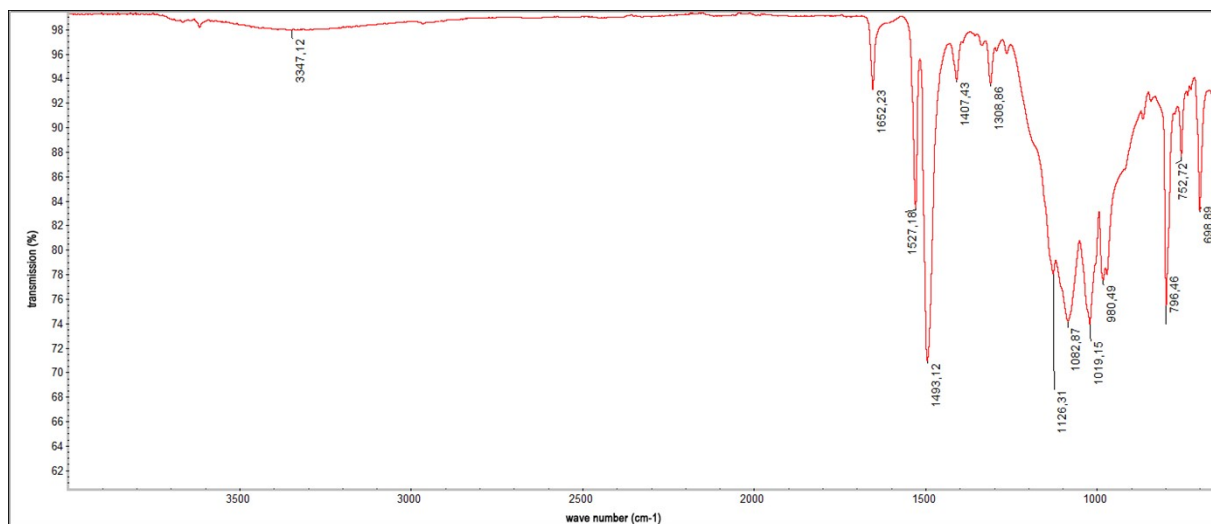

**Figure S14.** IR spectrum (neat) of  $[(F_5C_6)_3CO]Si(OH)_3$  (**2a**).

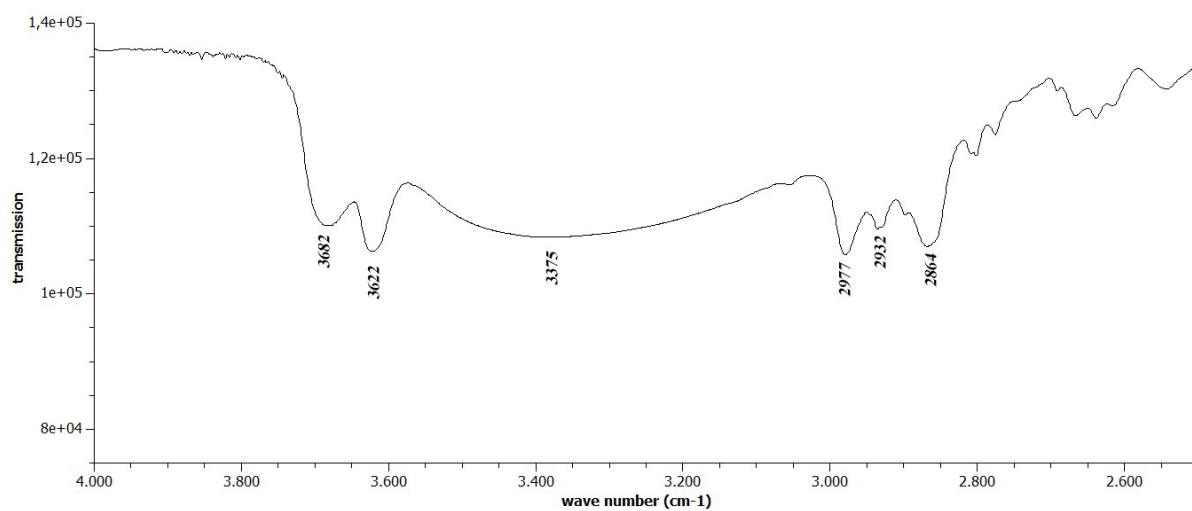

**Figure S15.** IR spectrum (sample dissolved in  $CCl_4$ ,  $c = 20 \text{ mg mL}^{-1}$ ) of  $[(F_5C_6)_3CO]Si(OH)_3$  (**2a**).

Characterization of  $\{[3,5-(\text{CF}_3)_2\text{C}_6\text{H}_3]_3\text{CO}\}\text{Si}(\text{OH})_3$  (2b).

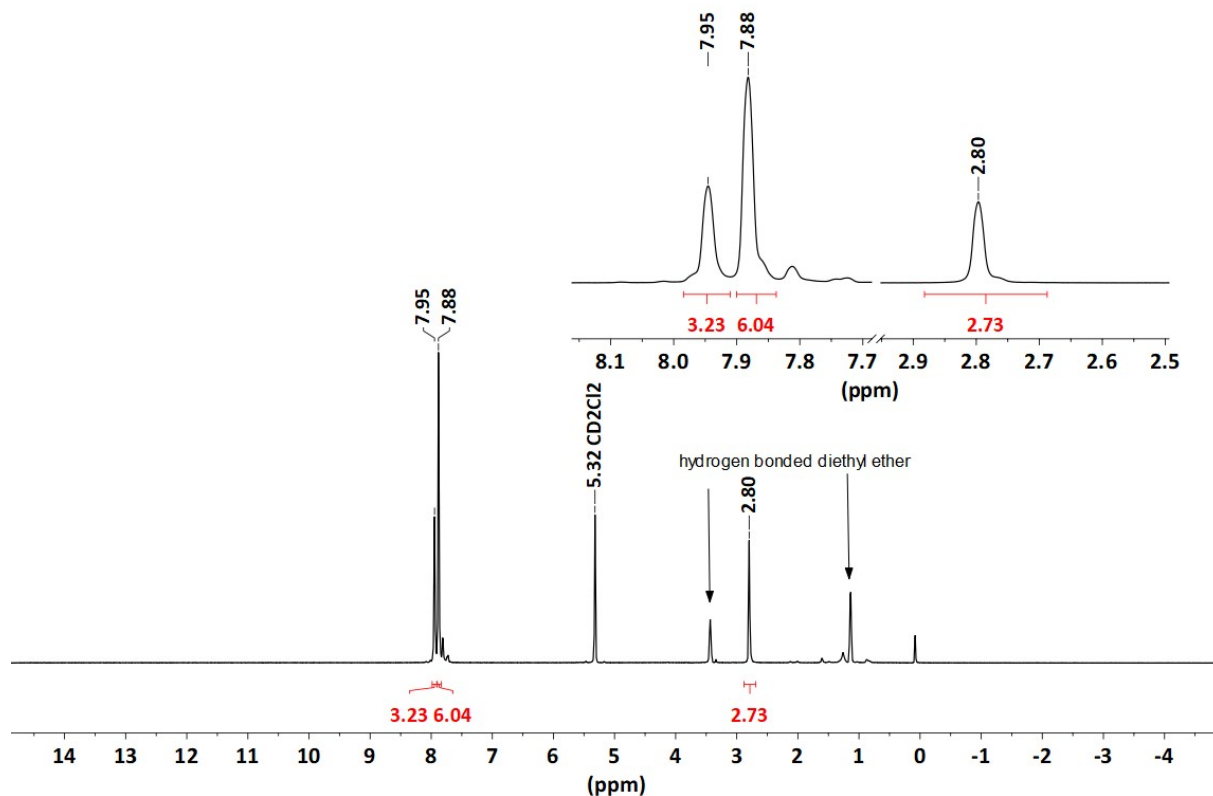

Figure S16.  $^1\text{H-NMR}$  spectrum (600.2 MHz,  $\text{CD}_2\text{Cl}_2$ ) of  $\{[3,5-(\text{CF}_3)_2\text{C}_6\text{H}_3]_3\text{CO}\}\text{Si}(\text{OH})_3$  (2b).

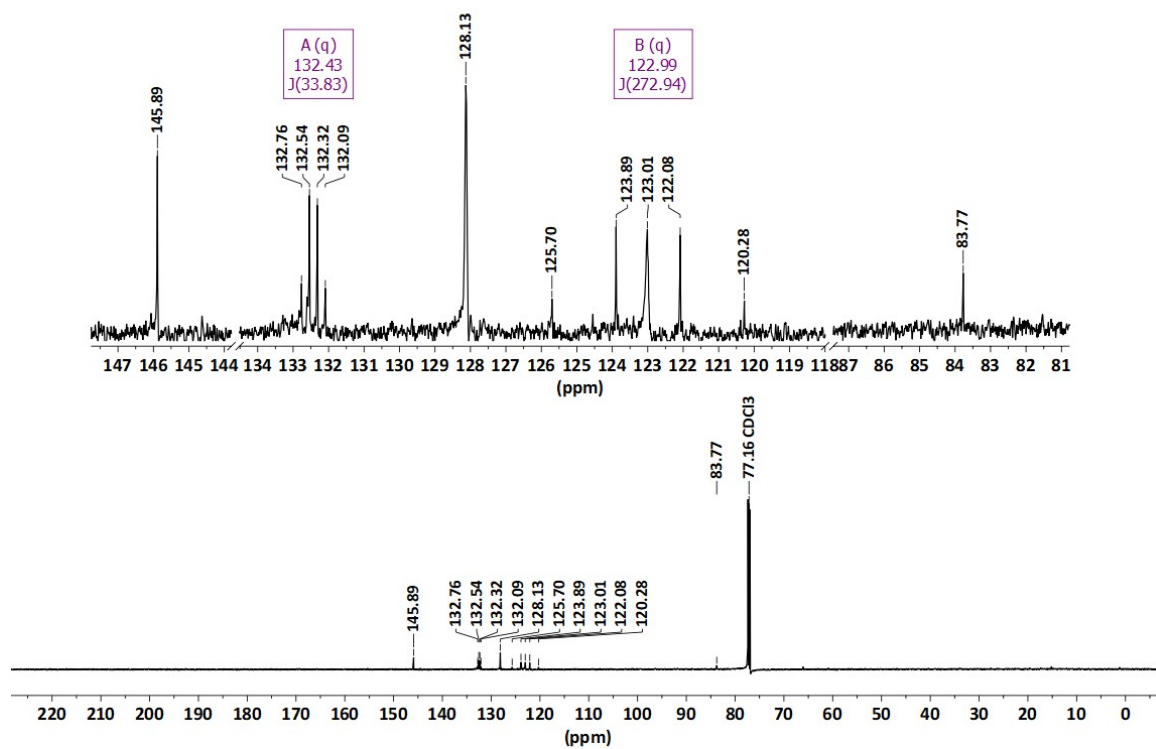

**Figure S17.**  $^{13}\text{C}$ - $\{^1\text{H}\}$ -NMR spectrum (150.9 MHz,  $\text{CDCl}_3$ ) of  $\{[3,5-(\text{CF}_3)_2\text{C}_6\text{H}_3]_3\text{CO}\}\text{Si}(\text{OH})_3$  (**2b**).

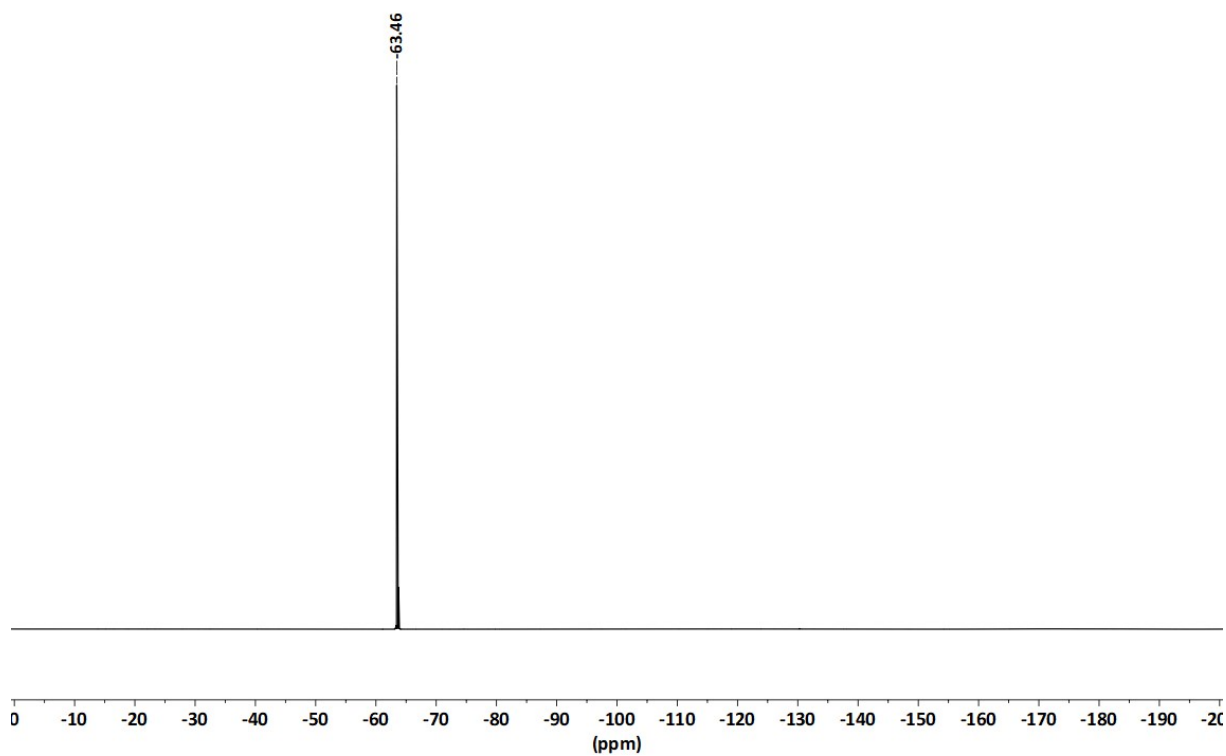

**Figure S18.**  $^{19}\text{F}$ -NMR spectrum (564.7 MHz,  $\text{CDCl}_3$ ) of  $\{[3,5-(\text{CF}_3)_2\text{C}_6\text{H}_3]_3\text{CO}\}\text{Si}(\text{OH})_3$  (**2b**).

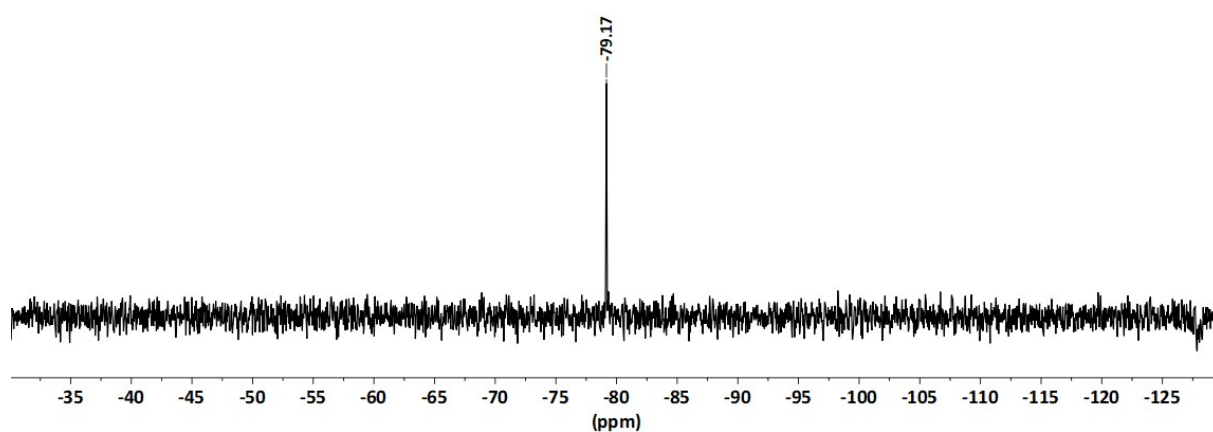

**Figure S19.**  $^{29}\text{Si}$ - $\{^1\text{H}\}$ -NMR spectrum (119.3 MHz,  $\text{CDCl}_3$ ) of  $\{[3,5-(\text{CF}_3)_2\text{C}_6\text{H}_3]_3\text{CO}\}\text{Si}(\text{OH})_3$  (**2b**).

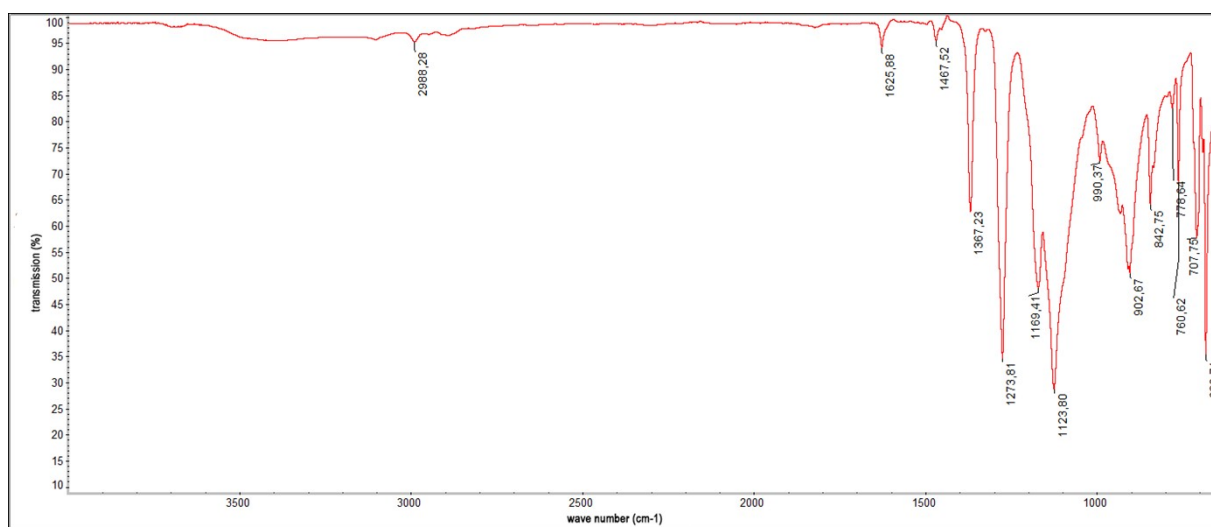

**Figure S20.** IR spectrum (neat) of {[3,5-(CF<sub>3</sub>)<sub>2</sub>C<sub>6</sub>H<sub>3</sub>]<sub>3</sub>CO}Si(OH)<sub>3</sub> (**2b**).

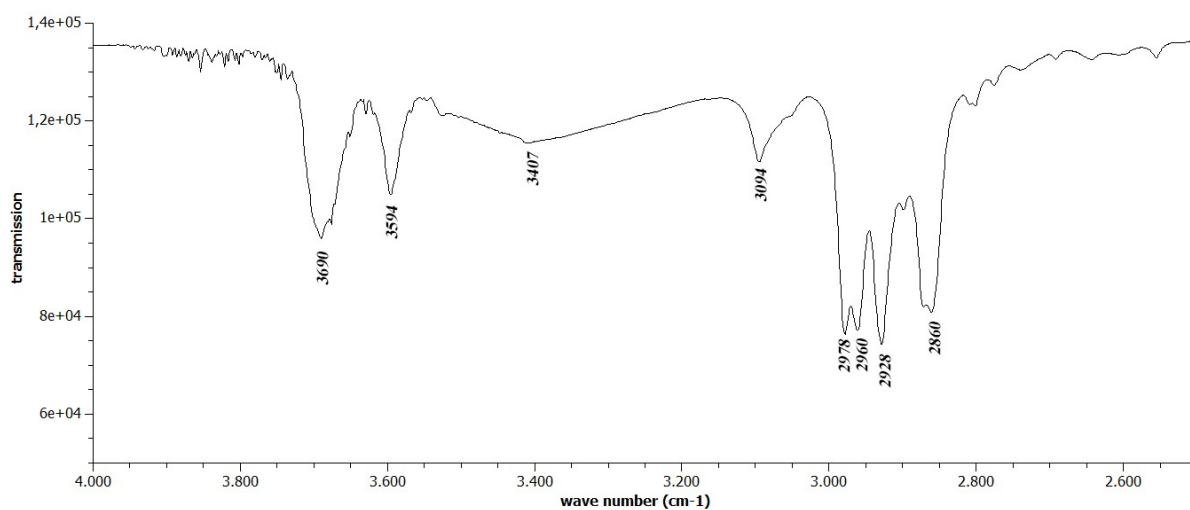

**Figure S21.** IR spectrum (sample dissolved in CCl<sub>4</sub>, c = 20 mg mL<sup>-1</sup>) of {[3,5-(CF<sub>3</sub>)<sub>2</sub>C<sub>6</sub>H<sub>3</sub>]<sub>3</sub>CO}Si(OH)<sub>3</sub> (**2b**).

**Characterization of [(F<sub>5</sub>C<sub>6</sub>)<sub>3</sub>CO]SiCl<sub>2</sub>)<sub>2</sub>O (**3a**).**

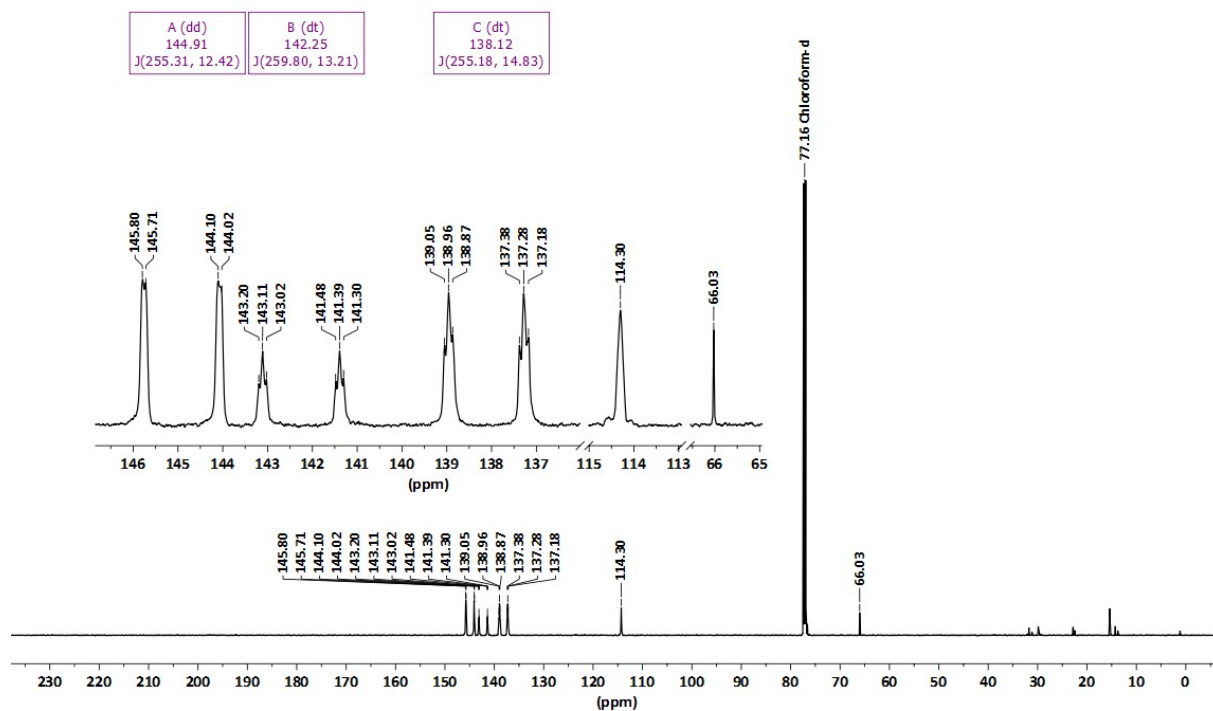

**Figure S22.**  $^{13}\text{C}\{-^1\text{H}\}$ -NMR spectrum (151.0 MHz,  $\text{CDCl}_3$ ) of  $\{[(\text{F}_5\text{C}_6)_3\text{CO}]\text{SiCl}_2\}_2\text{O}$  (**3a**).

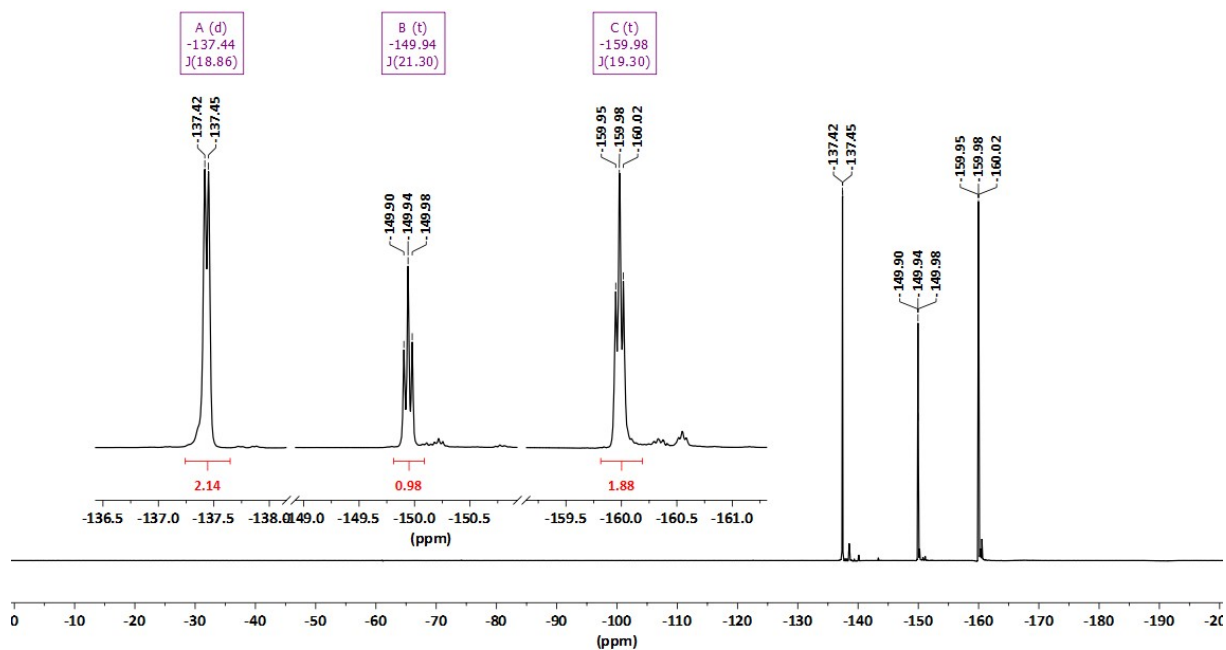

**Figure S23.**  $^{19}\text{F}$ -NMR spectrum (564.7 MHz,  $\text{CDCl}_3$ ) of  $\{[(\text{F}_5\text{C}_6)_3\text{CO}]\text{SiCl}_2\}_2\text{O}$  (**3a**).

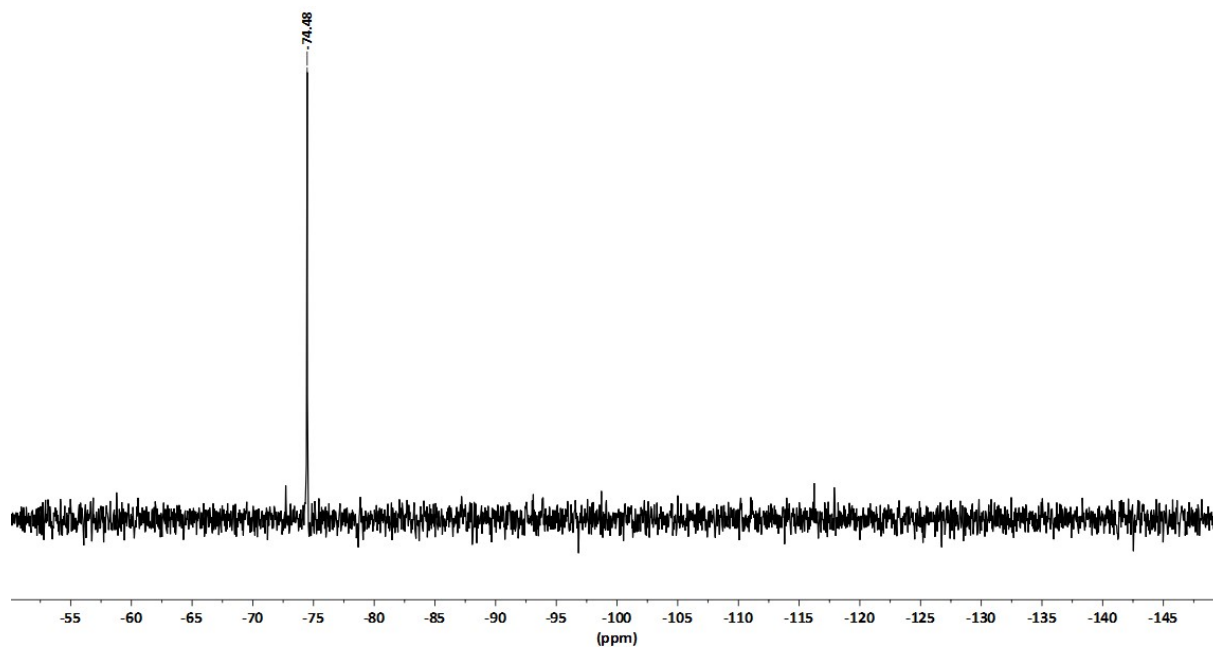

**Figure S24.**  $^{29}\text{Si}\{-^1\text{H}\}$ -NMR spectrum (119.3 MHz,  $\text{CDCl}_3$ ) of  $\{[(\text{F}_5\text{C}_6)_3\text{CO}]\text{SiCl}_2\}_2\text{O}$  (**3a**).

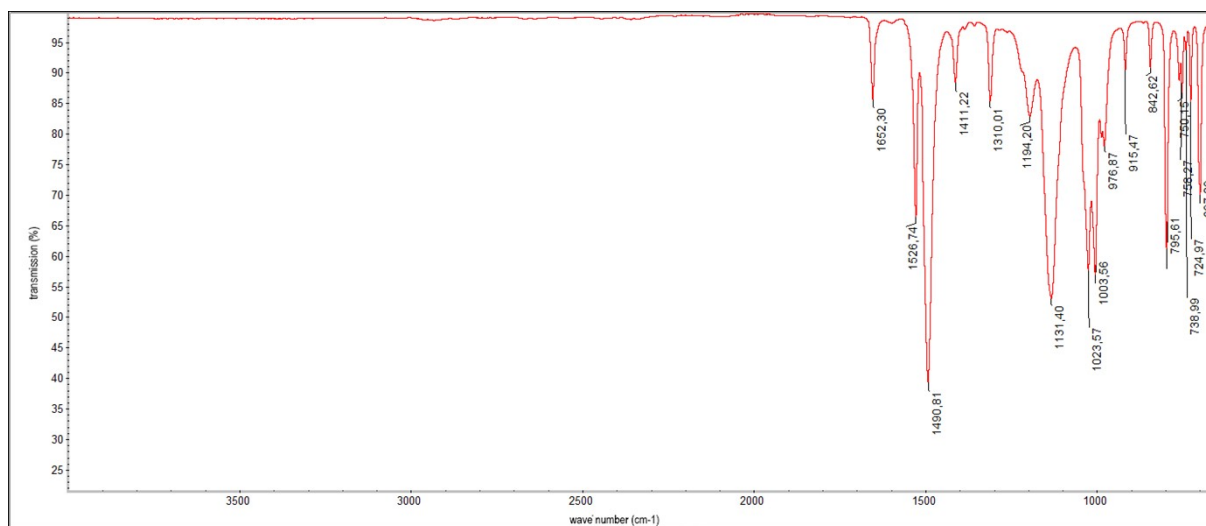

**Figure S25.** IR spectrum (neat) of  $\{[(\text{F}_5\text{C}_6)_3\text{CO}]\text{SiCl}_2\}_2\text{O}$  (**3a**).



Characterization of  $\{[(3,5-(\text{CF}_3)_2\text{C}_6\text{H}_3)_3\text{CO}]\text{SiCl}_2\}_2\text{O}$  (**3b**).

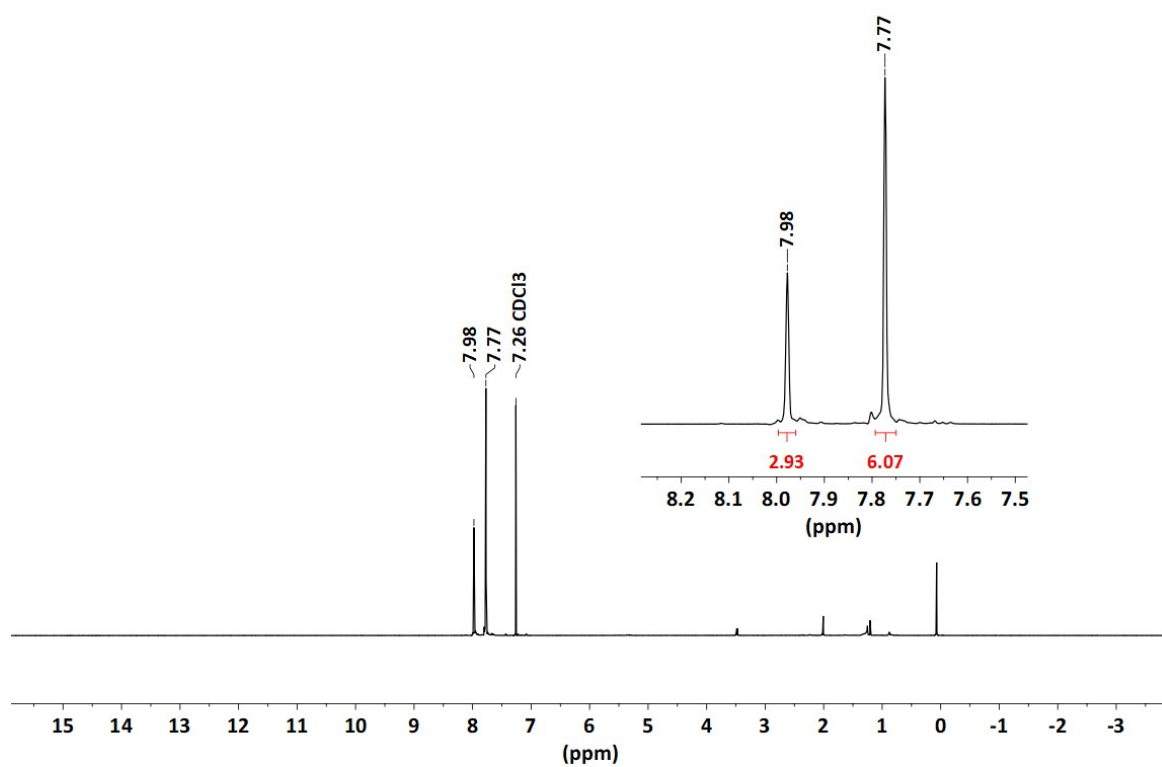

**Figure S26.**  $^1\text{H-NMR}$  spectrum (600.2 MHz,  $\text{CDCl}_3$ ) of  $\{[(3,5-(\text{CF}_3)_2\text{C}_6\text{H}_3)_3\text{CO}]\text{SiCl}_2\}_2\text{O}$  (**3b**).



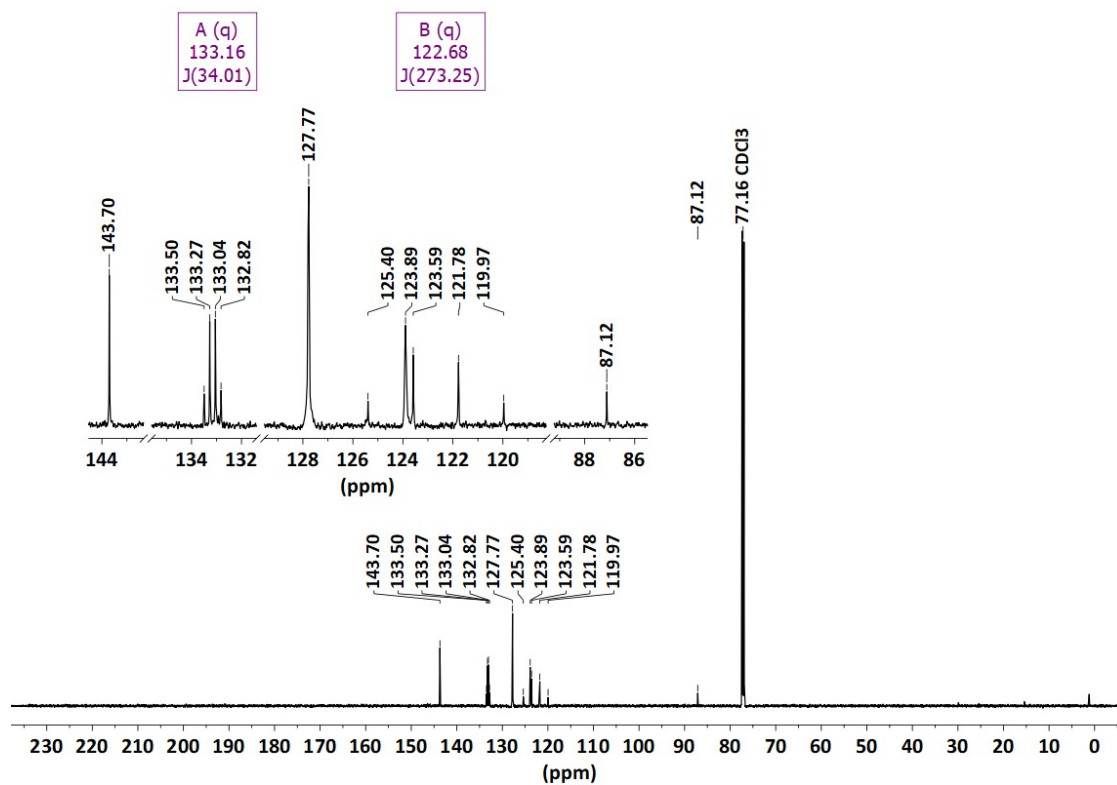

**Figure S27.**  $^{13}\text{C}\{-^1\text{H}\}$ -NMR spectrum (150.9 MHz,  $\text{CDCl}_3$ ) of  $\{[(3,5\text{-(CF}_3)_2\text{C}_6\text{H}_3)_3\text{CO}]\text{SiCl}_2\}_2\text{O}$  (**3b**).

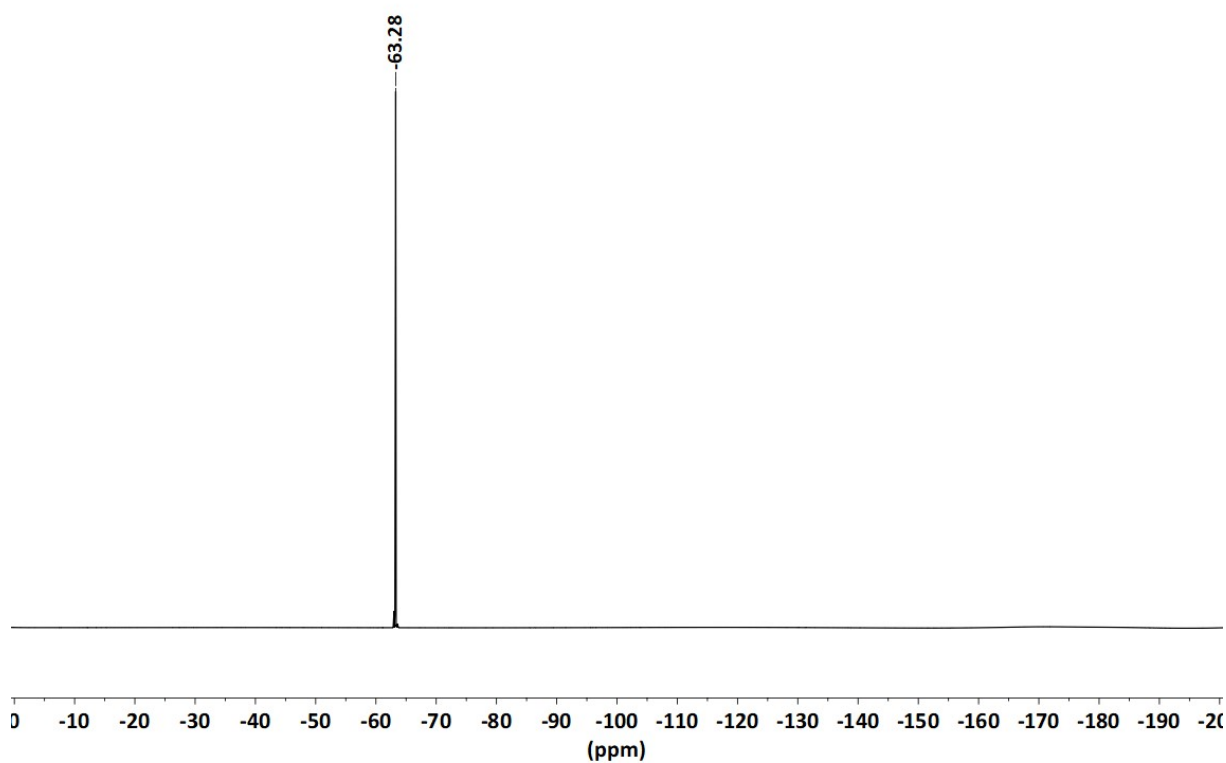

**Figure S28.**  $^{19}\text{F}$ -NMR spectrum (564.7 MHz,  $\text{CDCl}_3$ ) of  $\{[(3,5\text{-(CF}_3)_2\text{C}_6\text{H}_3)_3\text{CO}]\text{SiCl}_2\}_2\text{O}$  (**3b**).

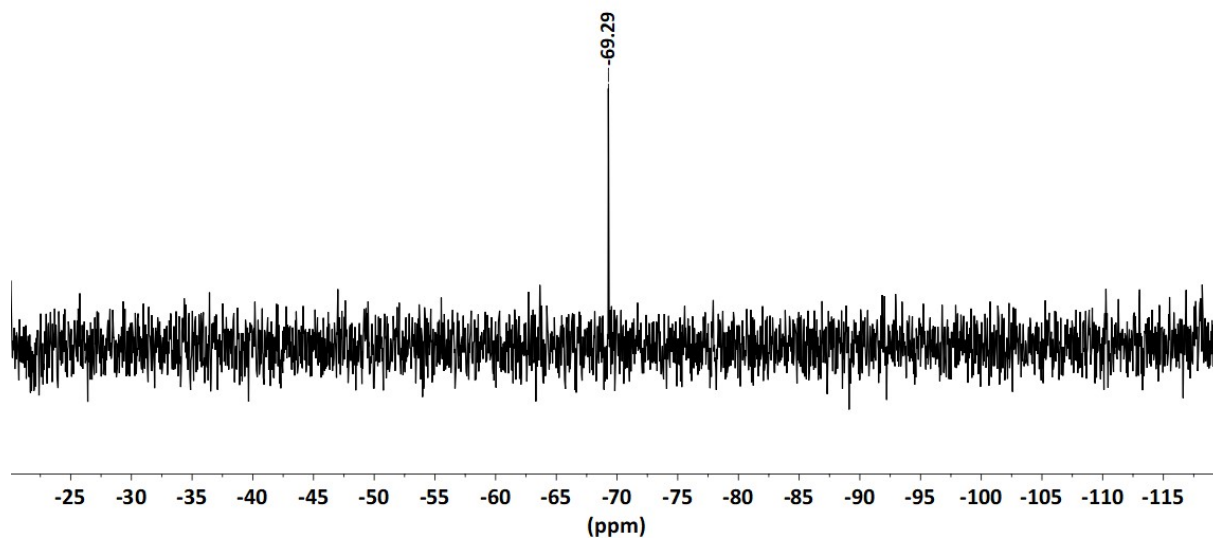

**Figure S29.**  $^{29}\text{Si}\{-^1\text{H}\}$ -NMR spectrum (119.3 MHz,  $\text{CDCl}_3$ ) of  $\{[(3,5\text{-}(\text{CF}_3)_2\text{C}_6\text{H}_3)_3\text{CO}]\text{SiCl}_2\}_2\text{O}$  (**3b**).

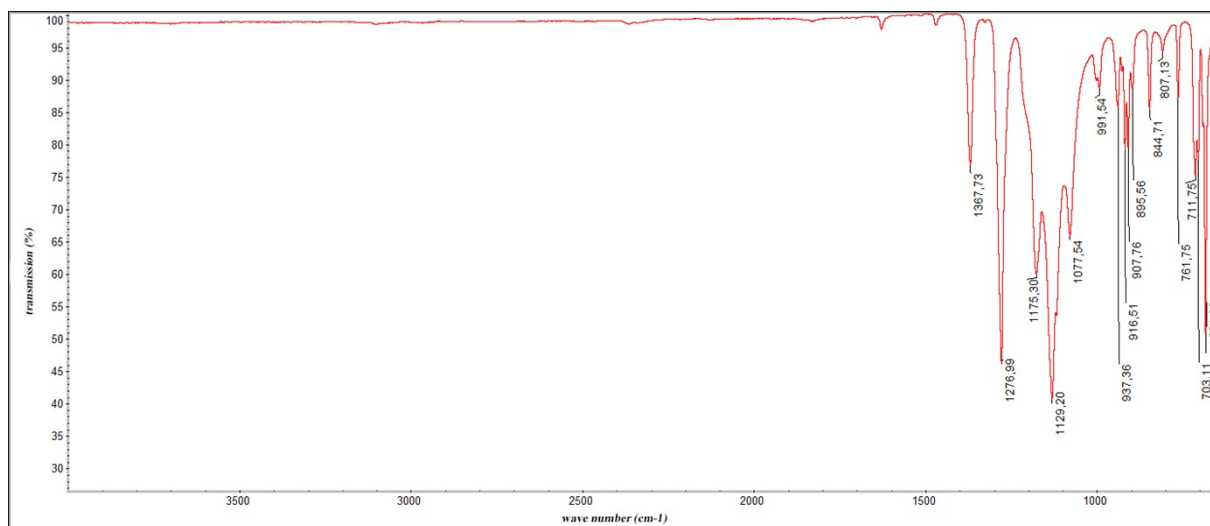

**Figure S30.** IR spectrum (neat) of  $\{[(3,5\text{-}(\text{CF}_3)_2\text{C}_6\text{H}_3)_3\text{CO}]\text{SiCl}_2\}_2\text{O}$  (**3b**).

# Characterization of $\{[(F_5C_6)_3CO]Si(OH)_2\}_2O \cdot Et_2O$ ( $4a \cdot Et_2O$ ).

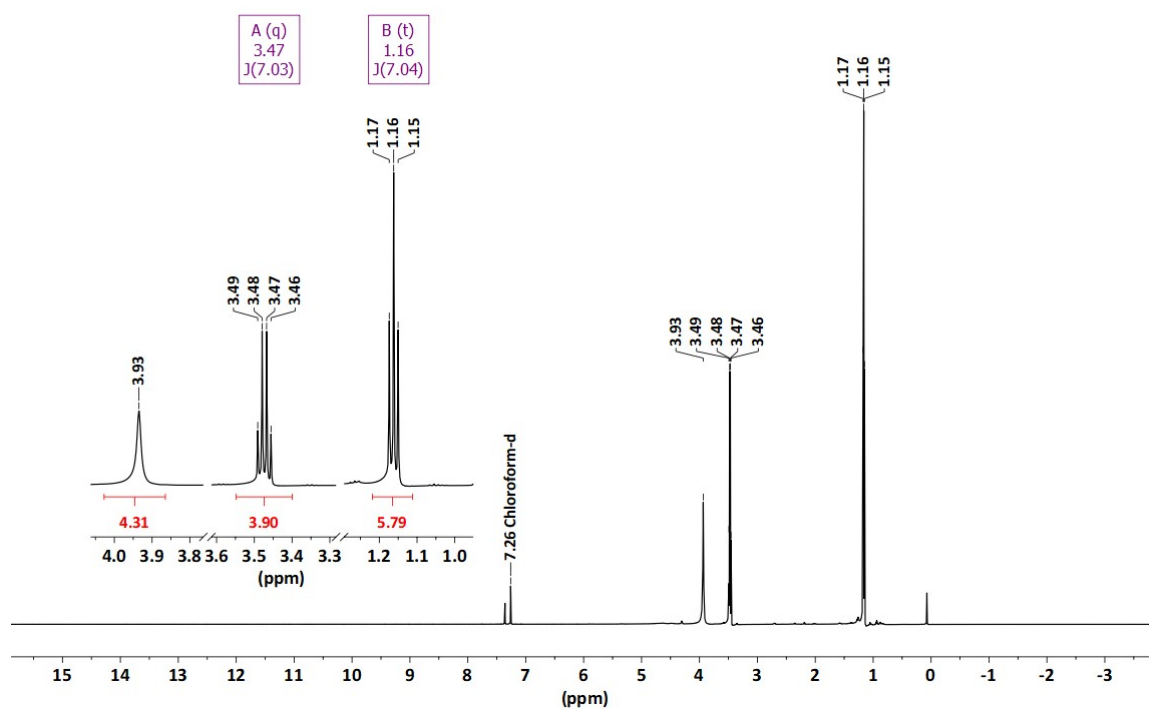

**Fig**

**re S31.**  $^1H$ -NMR (600.2 MHz,  $CDCl_3$ ) spectrum of  $\{[(F_5C_6)_3CO]Si(OH)_2\}_2O \cdot Et_2O$  ( $4a \cdot Et_2O$ ).

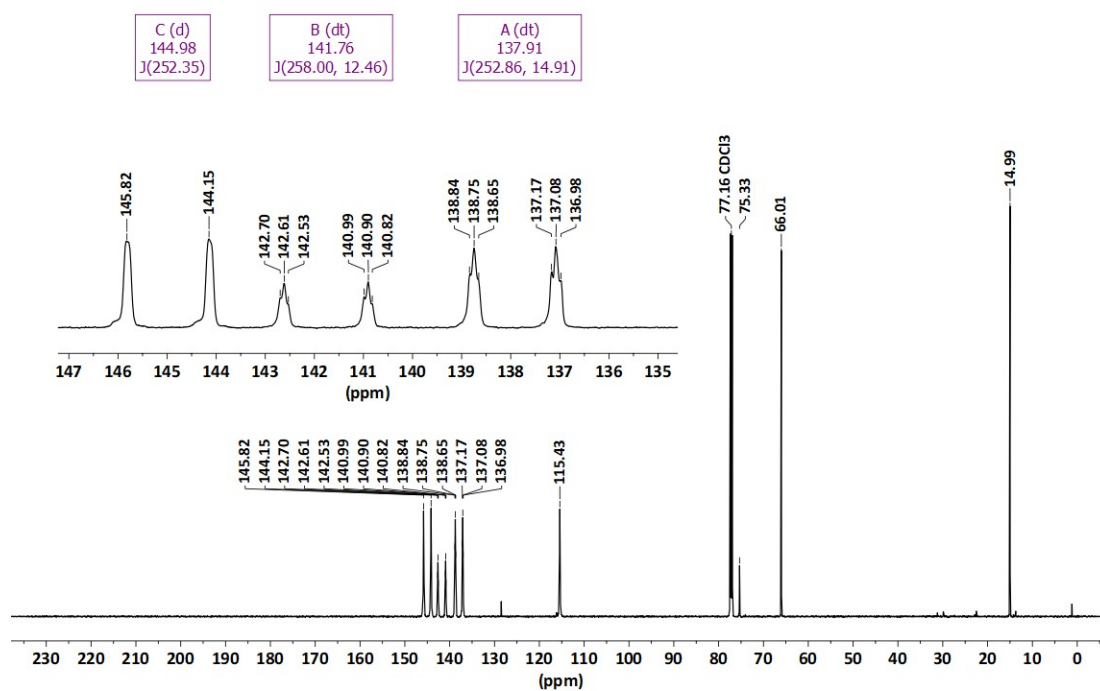

**Figure S32.**  $^{13}\text{C}$ - $\{^1\text{H}\}$ -NMR spectrum (150.9 MHz,  $\text{CDCl}_3$ ) of  $\{[(\text{F}_5\text{C}_6)_3\text{CO}]\text{Si}(\text{OH})_2\}_2\text{O}\cdot\text{Et}_2\text{O}$  (**4a** $\cdot\text{Et}_2\text{O}$ ).

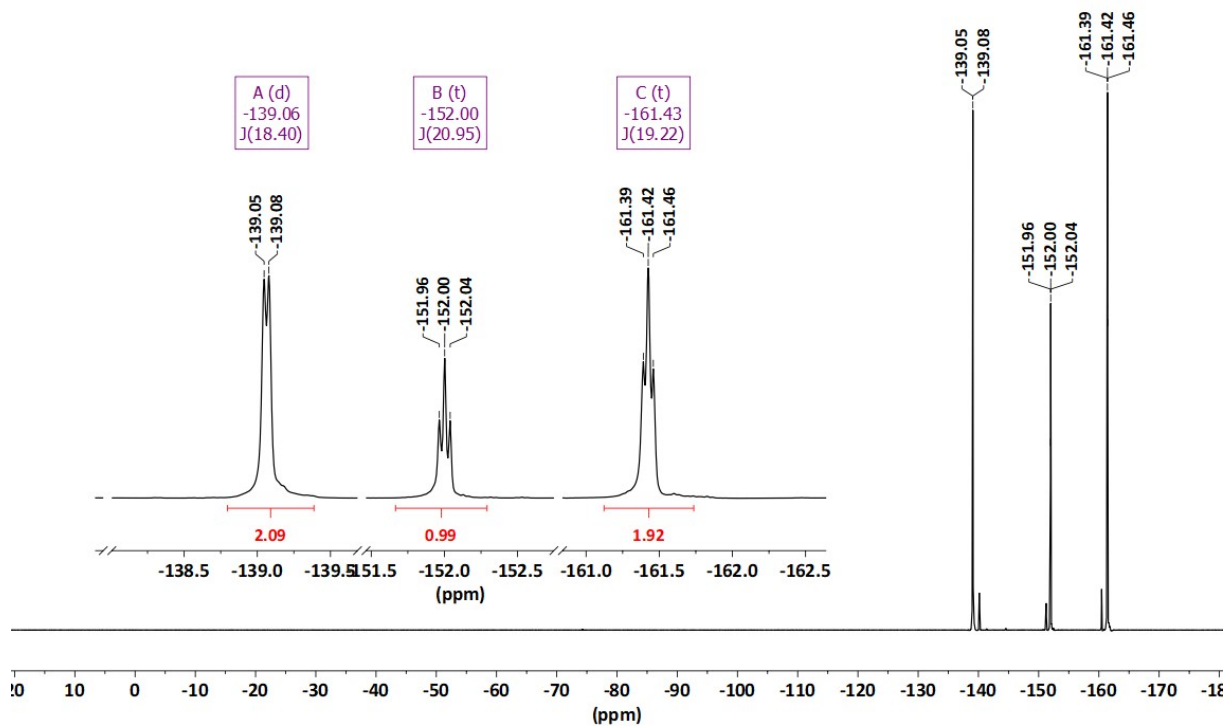

**Figure S33.**  $^{19}\text{F}$ -NMR spectrum (564.7 MHz,  $\text{CDCl}_3$ ) of  $\{[(\text{F}_5\text{C}_6)_3\text{CO}]\text{Si}(\text{OH})_2\}_2\text{O}\cdot\text{Et}_2\text{O}$  (**4a** $\cdot\text{Et}_2\text{O}$ ).

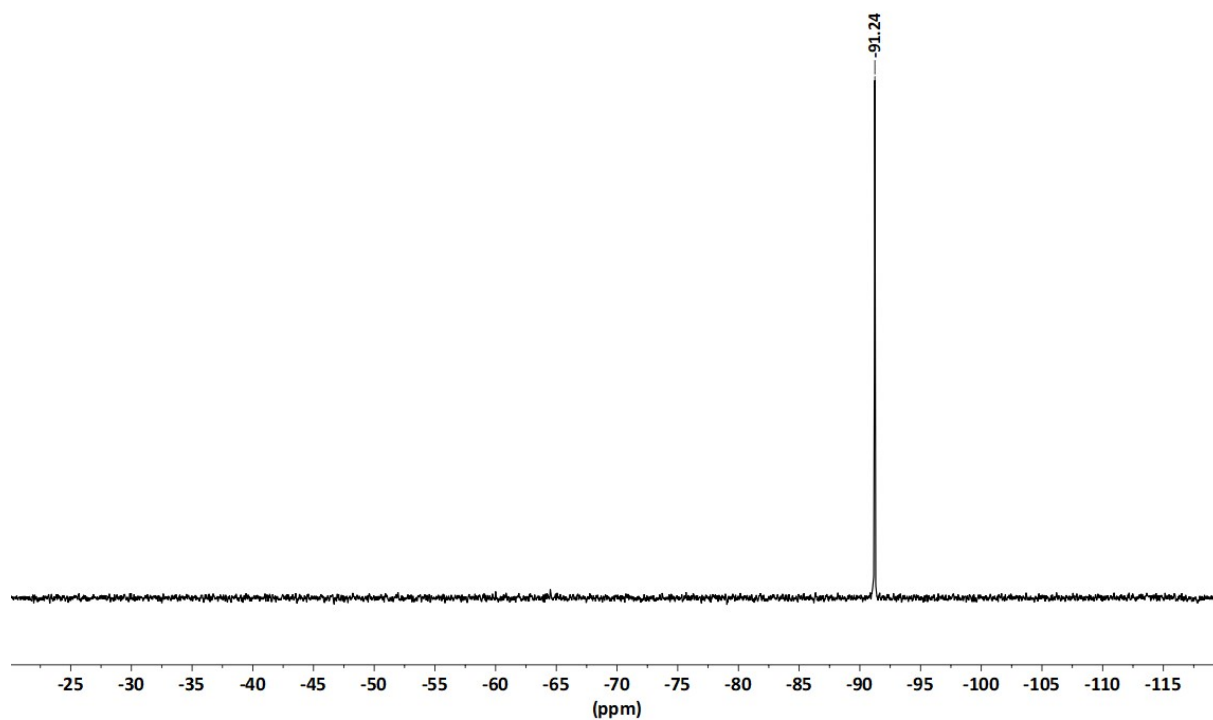

**Figure S34.**  $^{29}\text{Si}$ - $\{^1\text{H}\}$ -NMR (119.3 MHz,  $\text{CDCl}_3$ ) spectrum of  $\{[(\text{F}_5\text{C}_6)_3\text{CO}]\text{Si}(\text{OH})_2\}_2\text{O}\cdot\text{Et}_2\text{O}$  (**4a**· $\text{Et}_2\text{O}$ ).

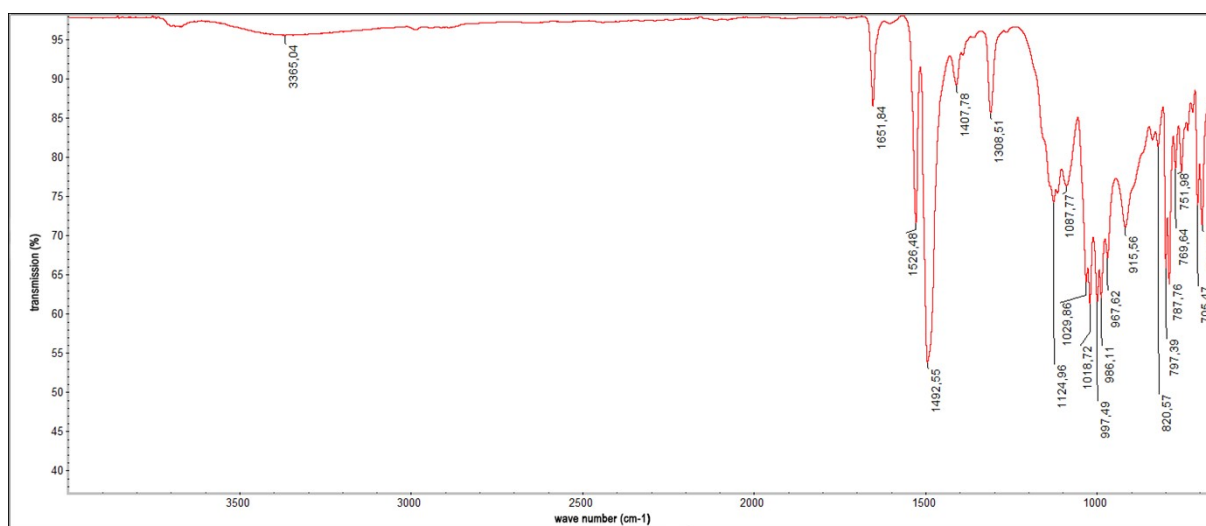

**Figure S35.** IR spectrum (neat) of  $\{[(\text{F}_5\text{C}_6)_3\text{CO}]\text{Si}(\text{OH})_2\}_2\text{O}\cdot\text{Et}_2\text{O}$  (**4a**· $\text{Et}_2\text{O}$ ).

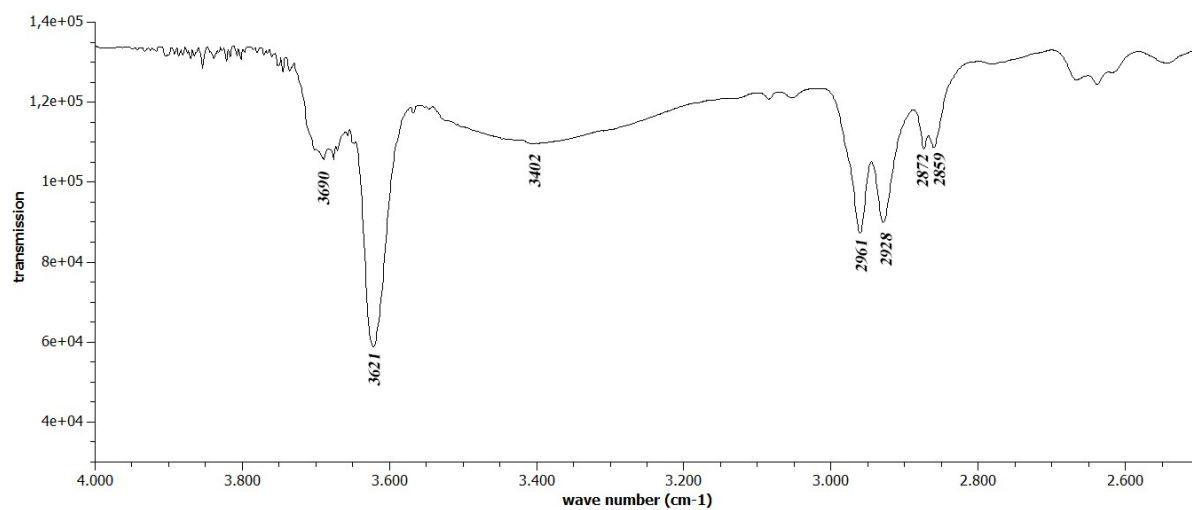

**Figure S36.** IR spectrum (sample dissolved in  $\text{CCl}_4$ ,  $c = 20 \text{ mg mL}^{-1}$ ) of  $[(\text{F}_5\text{C}_6)_3\text{COSi}(\text{OH})_2]_2\text{O} \cdot \text{Et}_2\text{O}$  (**4a**· $\text{Et}_2\text{O}$ ).

Characterization of  $[\{(3,5-(CF_3)_2C_6H_3)_3CO\}Si(OH)_2]_2O \cdot Et_2O$  (**4b**·Et<sub>2</sub>O).

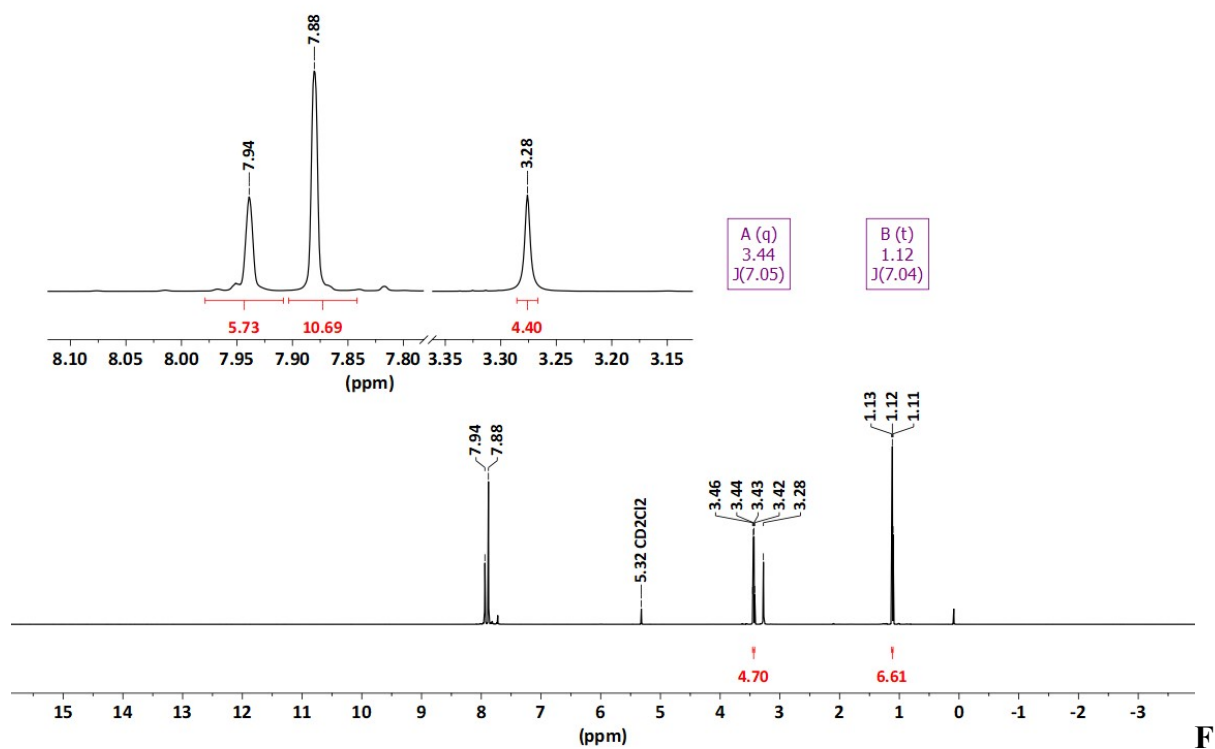

**figure S37.** <sup>1</sup>H-NMR spectrum (600.2 MHz, CD<sub>2</sub>Cl<sub>2</sub>) of  $[\{(3,5-(CF_3)_2C_6H_3)_3CO\}Si(OH)_2]_2O \cdot Et_2O$  (**4b**·Et<sub>2</sub>O).

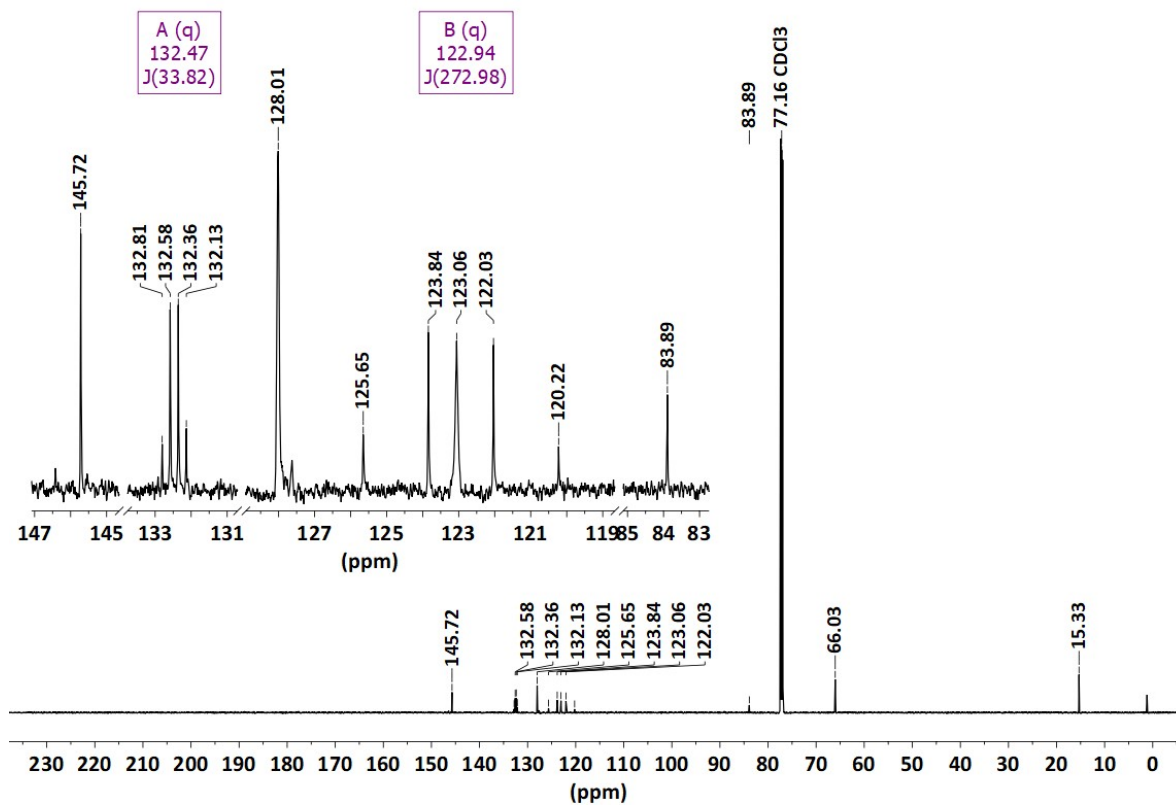

**Figure S38.**  $^{13}\text{C}$ - $\{^1\text{H}\}$ -NMR spectrum (150.9 MHz, CDCl<sub>3</sub>) of  $\{[(3,5\text{-}(\text{CF}_3)_2\text{C}_6\text{H}_3)_3\text{CO}]_2\text{Si}(\text{OH})_2\}_2\text{O}\cdot\text{Et}_2\text{O}$  ( $4\mathbf{b}\cdot\text{Et}_2\text{O}$ ).

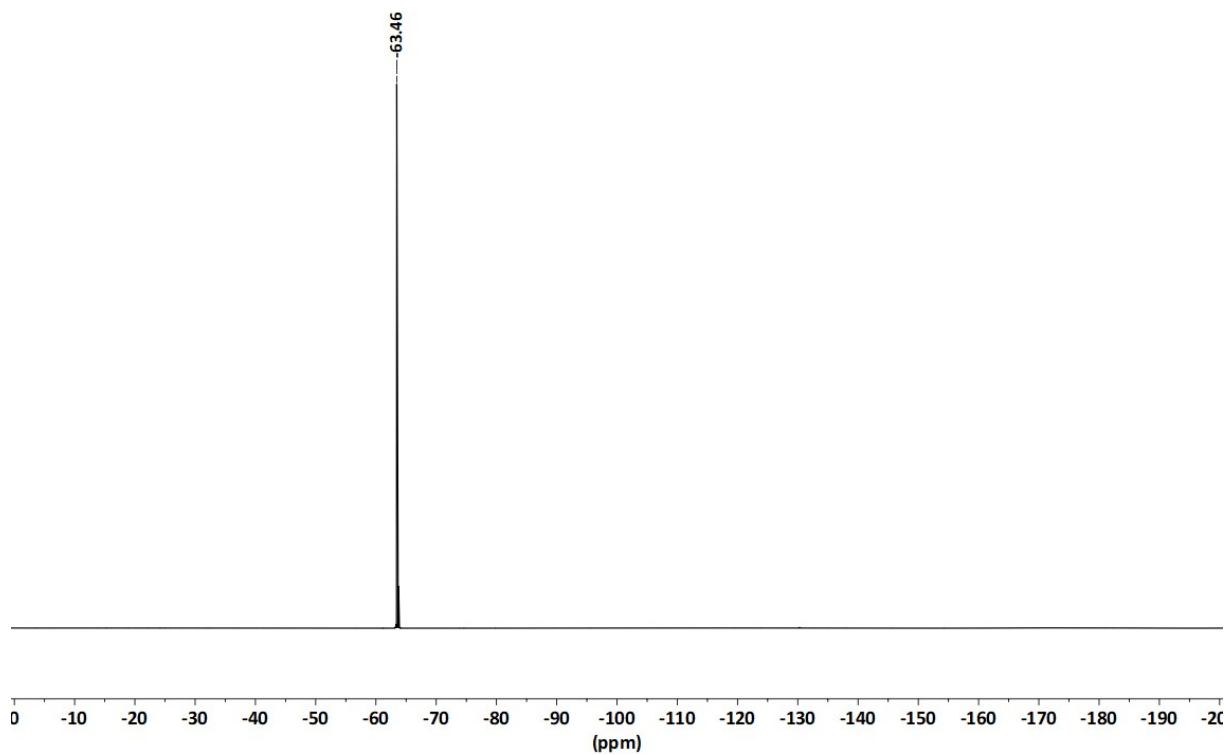

**Figure S39.**  $^{19}\text{F}$ -NMR spectrum (564.7 MHz, CDCl<sub>3</sub>) of  $\{[(3,5\text{-}(\text{CF}_3)_2\text{C}_6\text{H}_3)_3\text{CO}]_2\text{Si}(\text{OH})_2\}_2\text{O}\cdot\text{Et}_2\text{O}$  ( $4\mathbf{b}\cdot\text{Et}_2\text{O}$ ).



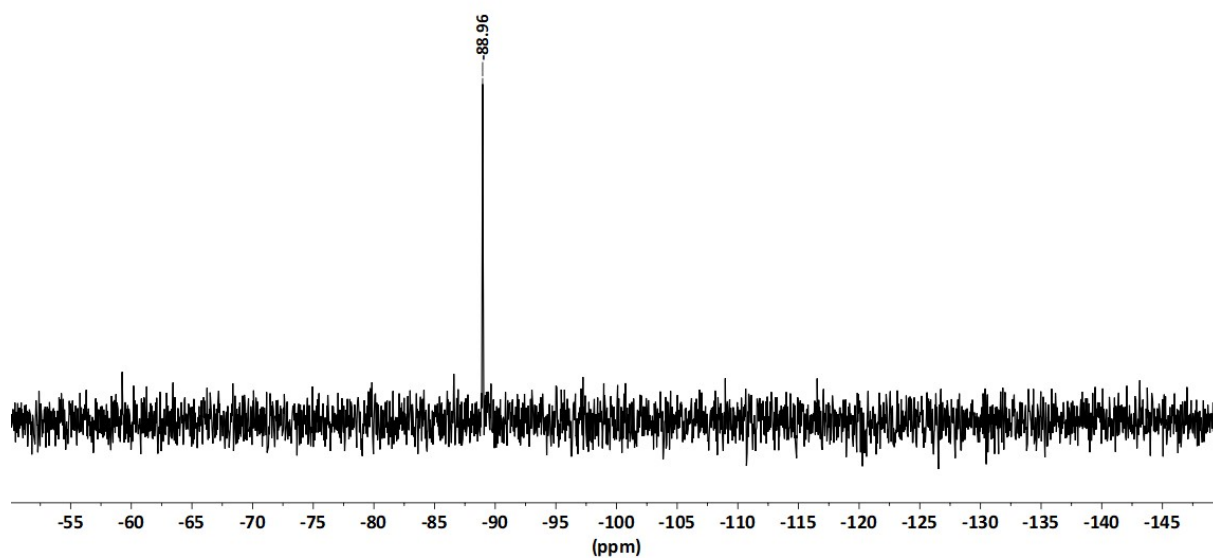

**Figure S40.**  $^{29}\text{Si}\{-^1\text{H}\}$ -NMR spectrum (119.3 MHz,  $\text{CDCl}_3$ ) of  $\{[(3,5-(\text{CF}_3)_2\text{C}_6\text{H}_3)_3\text{CO}]\text{Si}(\text{OH})_2\}_2\text{O}\cdot\text{Et}_2\text{O}$  (**4b**· $\text{Et}_2\text{O}$ ).

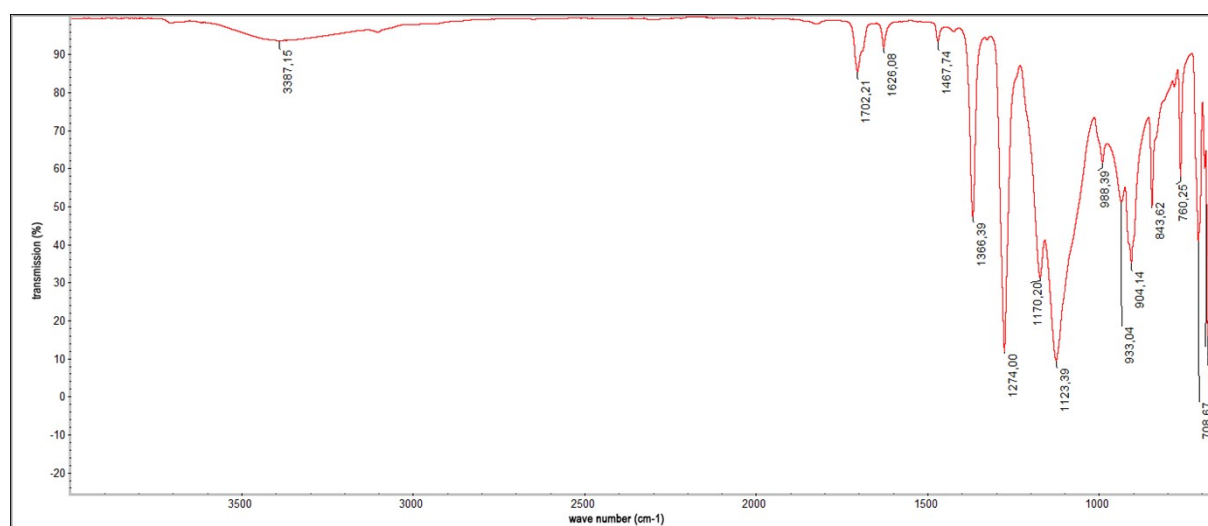

**Figure S41.** IR spectrum (neat) of  $\{[(3,5-(\text{CF}_3)_2\text{C}_6\text{H}_3)_3\text{CO}]\text{Si}(\text{OH})_2\}_2\text{O}\cdot\text{Et}_2\text{O}$  (**4b**· $\text{Et}_2\text{O}$ ).

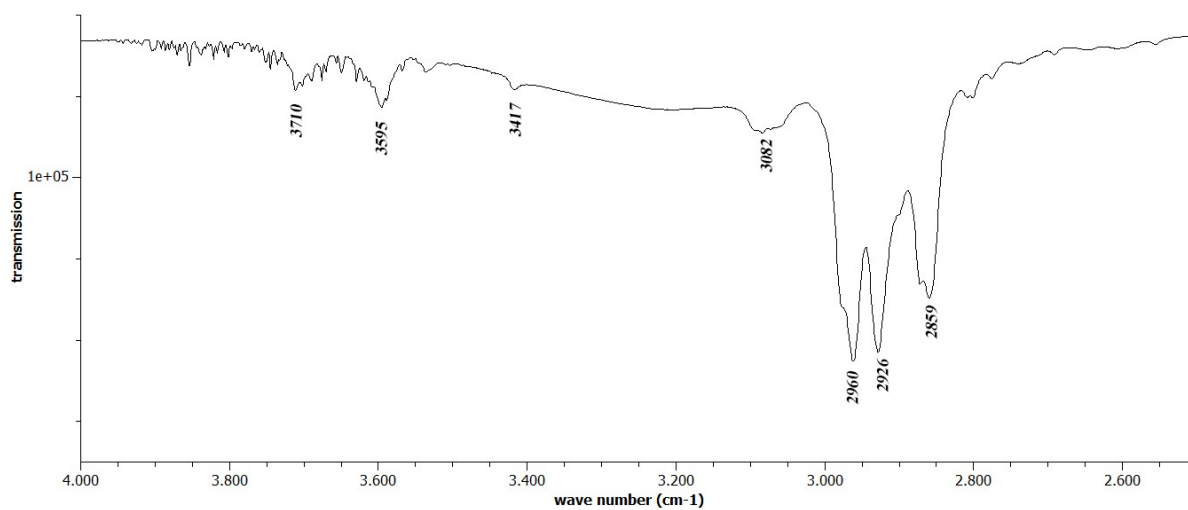

**Figure S42.** IR spectrum (sample dissolved in  $\text{CCl}_4$ ,  $c = 20 \text{ mg mL}^{-1}$ ) of  $\{[(3,5\text{-}(\text{CF}_3)_2\text{C}_6\text{H}_3)_3\text{COSi}(\text{OH})_2]_2\text{O}\cdot\text{Et}_2\text{O}$  (**4b** $\cdot\text{Et}_2\text{O}$ )

## Thermogravimetric Analysis

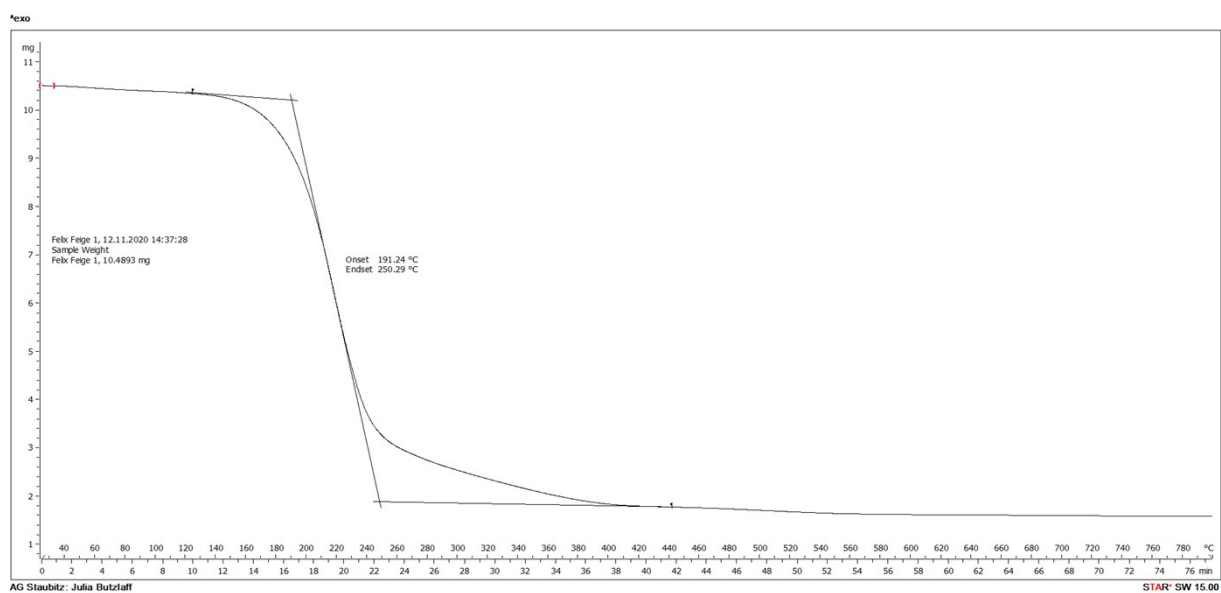

**Figure S43.** TGA spectrum of  $[(F_5C_6)_3CO]Si(OH)_3$  (**2a**).

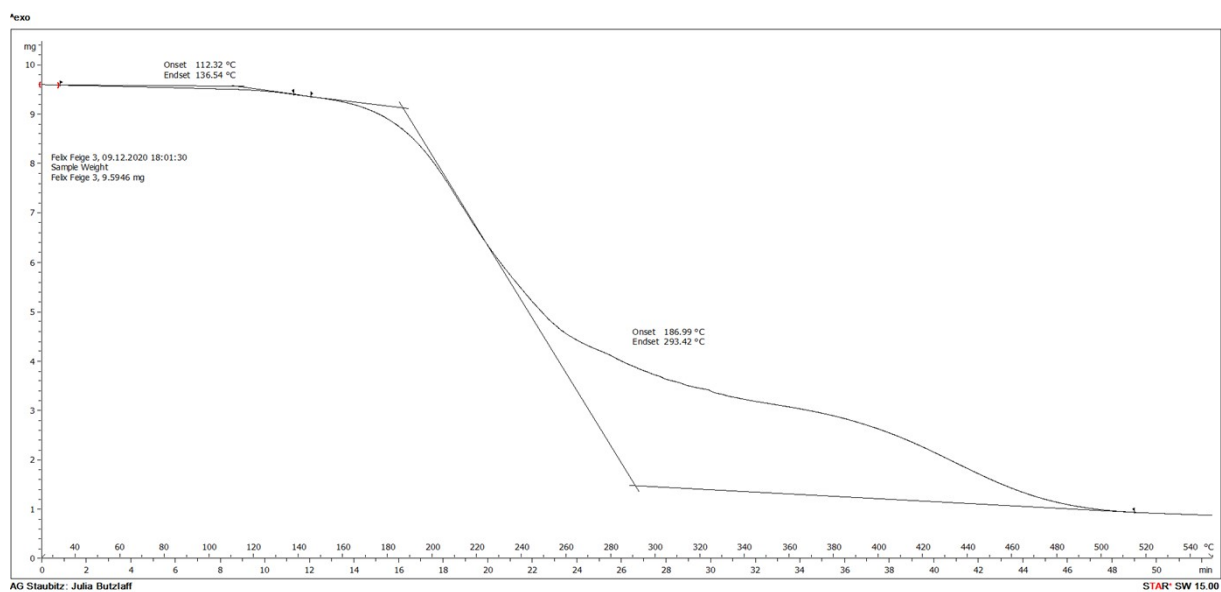

**Figure S44.** TGA spectrum of  $\{[3,5-(CF_3)_2C_6H_3]_3CO\}Si(OH)_3$  (**2b**).

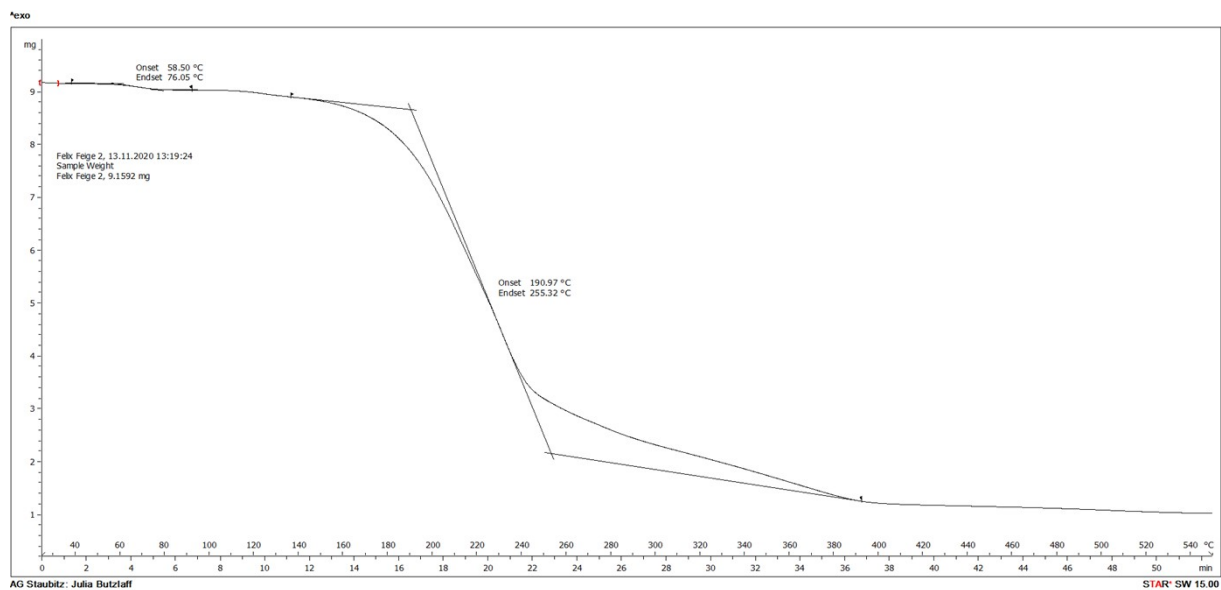

**Figure S45.** TGA spectrum of  $[(F_5C_6)_3COSi(OH)_2]_2O \cdot Et_2O$  (**4a**·Et<sub>2</sub>O).

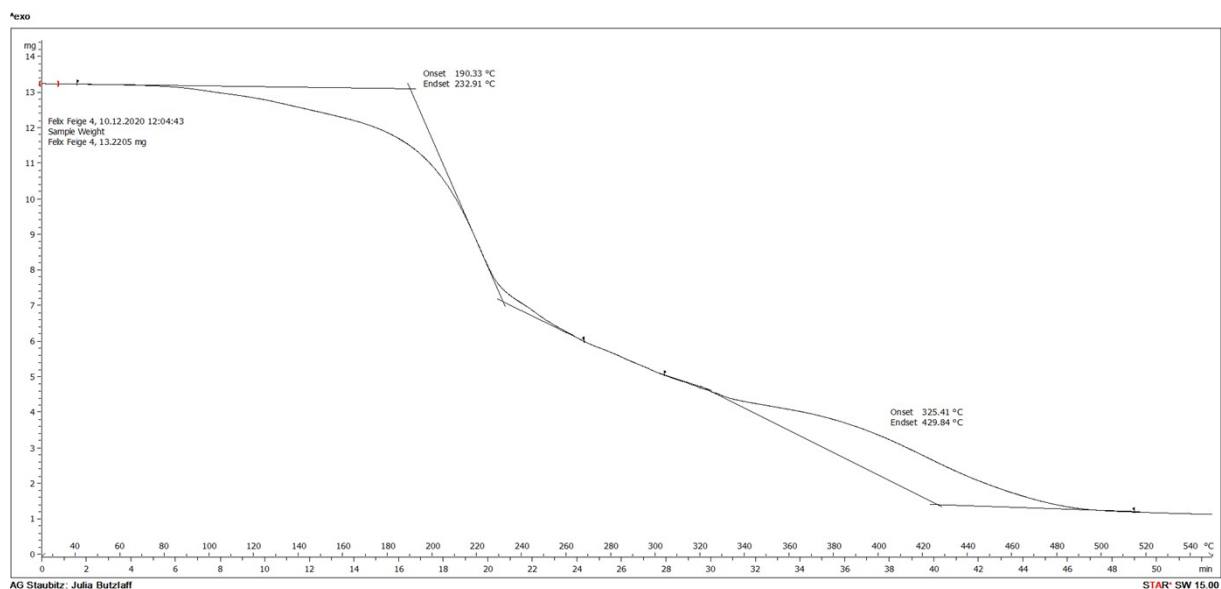

**Figure S46.** TGA spectrum of  $\{[(3,5-(CF_3)_2C_6H_3)_3COSi(OH)_2]_2O \cdot Et_2O$  (**4b**·Et<sub>2</sub>O).

## Crystallographic data

**Table S1.** Crystal data and structure refinement of **1a**, **1b** and **2a**.

|                                                                          | <b>1a</b>                                           | <b>1b</b>                                                          | <b>2a</b> ·½ C <sub>6</sub> H <sub>6</sub> ·½ Et <sub>2</sub> O                |
|--------------------------------------------------------------------------|-----------------------------------------------------|--------------------------------------------------------------------|--------------------------------------------------------------------------------|
| Formula                                                                  | C <sub>19</sub> Cl <sub>3</sub> F <sub>15</sub> OSi | C <sub>25</sub> H <sub>9</sub> Cl <sub>3</sub> F <sub>18</sub> OSi | C <sub>48</sub> H <sub>22</sub> F <sub>30</sub> O <sub>9</sub> Si <sub>2</sub> |
| Formula weight, g mol <sup>-1</sup>                                      | 663.63                                              | 801.76                                                             | 1368.83                                                                        |
| Crystal system                                                           | triclinic                                           | monoclinic                                                         | monoclinic                                                                     |
| Crystal size, mm                                                         | 0.30 × 0.20 × 0.20                                  | 0.20 × 0.20 × 0.05                                                 | 0.30 × 0.20 × 0.10                                                             |
| Space group                                                              | $P\bar{1}$                                          | P2 <sub>1</sub> /n                                                 | P2 <sub>1</sub> /c                                                             |
| <i>a</i> , Å                                                             | 11.0941(6)                                          | 11.9614(7)                                                         | 12.0975(4)                                                                     |
| <i>b</i> , Å                                                             | 11.1405(7)                                          | 14.8057(8)                                                         | 26.7831(9)                                                                     |
| <i>c</i> , Å                                                             | 11.2786(8)                                          | 16.808(1)                                                          | 15.9648(5)                                                                     |
| $\alpha$ , °                                                             | 60.792(2)                                           | 90                                                                 | 90                                                                             |
| $\beta$ , °                                                              | 63.338(2)                                           | 95.266(2)                                                          | 101.201(1)                                                                     |
| $\gamma$ , °                                                             | 65.129(2)                                           | 90                                                                 | 90                                                                             |
| <i>V</i> , Å <sup>3</sup>                                                | 1050.41(12)                                         | 2964.1(3)                                                          | 5074.2(3)                                                                      |
| <i>Z</i>                                                                 | 2                                                   | 4                                                                  | 4                                                                              |
| $\rho_{\text{calcd}}$ , Mg m <sup>-3</sup>                               | 2.098                                               | 1.797                                                              | 1.792                                                                          |
| $\mu$ (Mo <i>K</i> $\alpha$ ), mm <sup>-1</sup>                          | 0.641                                               | 0.485                                                              | 0.238                                                                          |
| <i>F</i> (000)                                                           | 4134                                                | 1576                                                               | 2720                                                                           |
| $\theta$ range, deg                                                      | 2.17 to 33.24                                       | 2.19 to 26.39                                                      | 2.32 to 30.60                                                                  |
| Index ranges                                                             | -17 ≤ <i>h</i> ≤ 17                                 | -14 ≤ <i>h</i> ≤ 15                                                | -16 ≤ <i>h</i> ≤ 16                                                            |
|                                                                          | -17 ≤ <i>k</i> ≤ 17                                 | -14 ≤ <i>k</i> ≤ 18                                                | -35 ≤ <i>k</i> ≤ 35                                                            |
|                                                                          | -17 ≤ <i>l</i> ≤ 17                                 | -21 ≤ <i>l</i> ≤ 21                                                | -21 ≤ <i>l</i> ≤ 21                                                            |
| No. of reflns collected                                                  | 36091                                               | 52041                                                              | 285954                                                                         |
| Completeness to $\theta_{\text{max}}$                                    | 99.9%                                               | 99.9%                                                              | 99.9%                                                                          |
| No. indep. Reflns                                                        | 8044                                                | 6101                                                               | 12569                                                                          |
| No. obsd reflns with ( <i>I</i> > 2 $\sigma$ ( <i>I</i> ))               | 7089                                                | 4081                                                               | 10810                                                                          |
| No. refined params                                                       | 352                                                 | 433                                                                | 810                                                                            |
| GooF ( <i>F</i> <sup>2</sup> )                                           | 1.043                                               | 1.071                                                              | 1.073                                                                          |
| <i>R</i> <sub>1</sub> ( <i>F</i> ) ( <i>I</i> > 2 $\sigma$ ( <i>I</i> )) | 0.0316                                              | 0.0644                                                             | 0.0486                                                                         |
| <i>wR</i> <sub>2</sub> ( <i>F</i> <sup>2</sup> ) (all data)              | 0.0883                                              | 0.1193                                                             | 0.1311                                                                         |
| Largest diff peak/hole, e Å <sup>-3</sup>                                | 0.683 / -0.727                                      | 1.355 / -1.986                                                     | 1.594 / -0.716                                                                 |

CCDC number                      2114061                      2114062                      2114063

**Table S2.** Crystal data and structure refinement of **3a**, **4a** and **4b**.

|                                                                          | <b>3a</b>                                                                      | <b>4a</b>                                                                     | <b>4b</b> ·OEt <sub>2</sub>                                                    |
|--------------------------------------------------------------------------|--------------------------------------------------------------------------------|-------------------------------------------------------------------------------|--------------------------------------------------------------------------------|
| Formula                                                                  | C <sub>38</sub> Cl <sub>4</sub> F <sub>30</sub> O <sub>3</sub> Si <sub>2</sub> | C <sub>38</sub> H <sub>4</sub> F <sub>30</sub> O <sub>7</sub> Si <sub>2</sub> | C <sub>54</sub> H <sub>32</sub> F <sub>36</sub> O <sub>8</sub> Si <sub>2</sub> |
| Formula weight, g mol <sup>-1</sup>                                      | 1272.36                                                                        | 1198.59                                                                       | 1548.97                                                                        |
| Crystal system                                                           | triclinic                                                                      | triclinic                                                                     | monoclinic                                                                     |
| Crystal size, mm                                                         | 0.20 × 0.20 × 0.15                                                             | 0.30 × 0.30 × 0.20                                                            | 0.20 × 0.20 × 0.20                                                             |
| Space group                                                              | $P\bar{1}$                                                                     | $P\bar{1}$                                                                    | P2 <sub>1</sub> /n                                                             |
| <i>a</i> , Å                                                             | 9.7408(6)                                                                      | 11.0814(13)                                                                   | 13.8065(7)                                                                     |
| <i>b</i> , Å                                                             | 9.8621(5)                                                                      | 13.9764(15)                                                                   | 25.8702(10)                                                                    |
| <i>c</i> , Å                                                             | 11.9048(6)                                                                     | 14.1905(17)                                                                   | 18.0791(8)                                                                     |
| $\alpha$ , °                                                             | 85.373(2)                                                                      | 108.150(4)                                                                    | 90                                                                             |
| $\beta$ , °                                                              | 78.198(2)                                                                      | 104.185(4)                                                                    | 106.562(2)                                                                     |
| $\gamma$ , °                                                             | 63.964(2)                                                                      | 100.559(4)                                                                    | 90                                                                             |
| <i>V</i> , Å <sup>3</sup>                                                | 1005.80(10)                                                                    | 1942.7(4)                                                                     | 6189.5(5)                                                                      |
| <i>Z</i>                                                                 | 1                                                                              | 2                                                                             | 4                                                                              |
| $\rho_{\text{calcd}}$ , Mg m <sup>-3</sup>                               | 2.101                                                                          | 2.049                                                                         | 1.662                                                                          |
| $\mu$ (Mo <i>K</i> $\alpha$ ), mm <sup>-1</sup>                          | 0.538                                                                          | 0.292                                                                         | 0.218                                                                          |
| <i>F</i> (000)                                                           | 618                                                                            | 1172                                                                          | 3088                                                                           |
| $\theta$ range, deg                                                      | 2.30 to 28.30                                                                  | 1.98 to 28.46                                                                 | 2.19 to 28.29                                                                  |
| Index ranges                                                             | -12 ≤ <i>h</i> ≤ 12                                                            | -14 ≤ <i>h</i> ≤ 14                                                           | -18 ≤ <i>h</i> ≤ 18                                                            |
|                                                                          | -13 ≤ <i>k</i> ≤ 13                                                            | -18 ≤ <i>k</i> ≤ 18                                                           | -34 ≤ <i>k</i> ≤ 34                                                            |
|                                                                          | -15 ≤ <i>l</i> ≤ 15                                                            | -18 ≤ <i>l</i> ≤ 18                                                           | -24 ≤ <i>l</i> ≤ 24                                                            |
| No. of reflns collected                                                  | 28633                                                                          | 44012                                                                         | 164878                                                                         |
| Completeness to $\theta_{\text{max}}$                                    | 99.9%                                                                          | 99.9%                                                                         | 99.9%                                                                          |
| No. indep. Reflns                                                        | 4964                                                                           | 9698                                                                          | 15340                                                                          |
| No. obsd reflns with ( <i>I</i> > 2 $\sigma$ ( <i>I</i> ))               | 3713                                                                           | 7278                                                                          | 11621                                                                          |
| No. refined params                                                       | 358                                                                            | 698                                                                           | 988                                                                            |
| GooF ( <i>F</i> <sup>2</sup> )                                           | 1.029                                                                          | 1.044                                                                         | 1.025                                                                          |
| <i>R</i> <sub>1</sub> ( <i>F</i> ) ( <i>I</i> > 2 $\sigma$ ( <i>I</i> )) | 0.0445                                                                         | 0.0621                                                                        | 0.0597                                                                         |
| <i>wR</i> <sub>2</sub> ( <i>F</i> <sup>2</sup> ) (all data)              | 0.1056                                                                         | 0.1825                                                                        | 0.1610                                                                         |
| Largest diff peak/hole, e Å <sup>-3</sup>                                | 0.390 / -0.459                                                                 | 1.032 / -0.733                                                                | 1.960 / -1.084                                                                 |
| CCDC number                                                              | 2114064                                                                        | 2114065                                                                       | 2114066                                                                        |
